# Supplementary material
Source: publisher figshare collection journal article supplement (https://acs.figshare.com/ndownloader/files/15544481)

## Supporting Information

### Proteomic Analysis of Plasma-derived Extracellular Vesicles in Smokers and Patients with Chronic Obstructive Pulmonary Disease

Isaac K. Sundar<sup>1\*</sup>, Dongmei Li<sup>2</sup>, and Irfan Rahman<sup>1</sup>

<sup>1</sup>Department of Environmental Medicine, and <sup>2</sup>Department of Clinical & Translational Research,  
University of Rochester Medical Center,  
Rochester, NY, USA

#### Supplementary Figure Legends:

**Figure S1. Representative sample of plasma-derived EVs isolated by ExoSpin method was split into two to compare before and after depletion of IgG.** Lane 1: Protein molecular weight marker; Lane 2: EV lysate before IgG depletion; Lane 3: EV lysates passed through slurry of Protein G sepharose fast flow prior to running the gel.

**Figure S2. Hierarchical clustering analyses of plasma-derived EV peptide and PSMs counts.** (A) Intensity heatmap of peptide counts identified by LC-MS/MS proteomics. (B) Intensity heatmap of PSM counts identified by LC-MS/MS proteomics.

**Figure S3. Hierarchical clustering analyses of plasma-derived EVs based of peptide counts.** Intensity heatmap of PSM counts for significant proteins identified by LC-MS/MS proteomics among (A) Non-smokers vs. Smokers. (B) Non-smokers vs. COPD and (C) Smokers vs. COPD groups.

**Figure S4. STRING protein-protein interaction (PPI) network using the proteins identified in this study vs. Top 100 EV markers from plasma proteome database (PPD).** (A) String PPI network connectivity of human plasma-derived EV protein cluster compared between non-smokers vs. smokers based on peptides. Network contains 29 edges (vs. 1 expected edges); clustering coefficient 0.53; enrichment p-value < 0.001. Confidence score threshold was set at 0.4 (medium) for the analysis. (B) String PPI network connectivity of human plasma-derived EV protein cluster compared between smokers vs. COPD based on peptides. Network contains 49 edges (vs. 4 expected edges); clustering coefficient 0.47; enrichment p-value < 0.001. Confidence score threshold was set at 0.4 (medium) for the analysis.

**Figure S5. Full membrane used for slot-blot analysis of plasma-derived EVs surface markers.** Equal volume of lysed EV proteins were first loaded into nitrocellulose membranes using slot blot apparatus before probing for EV surface markers (proteins) such as TSG101, Rab-5b and Alix using target specific antibodies.

**Figure S1**

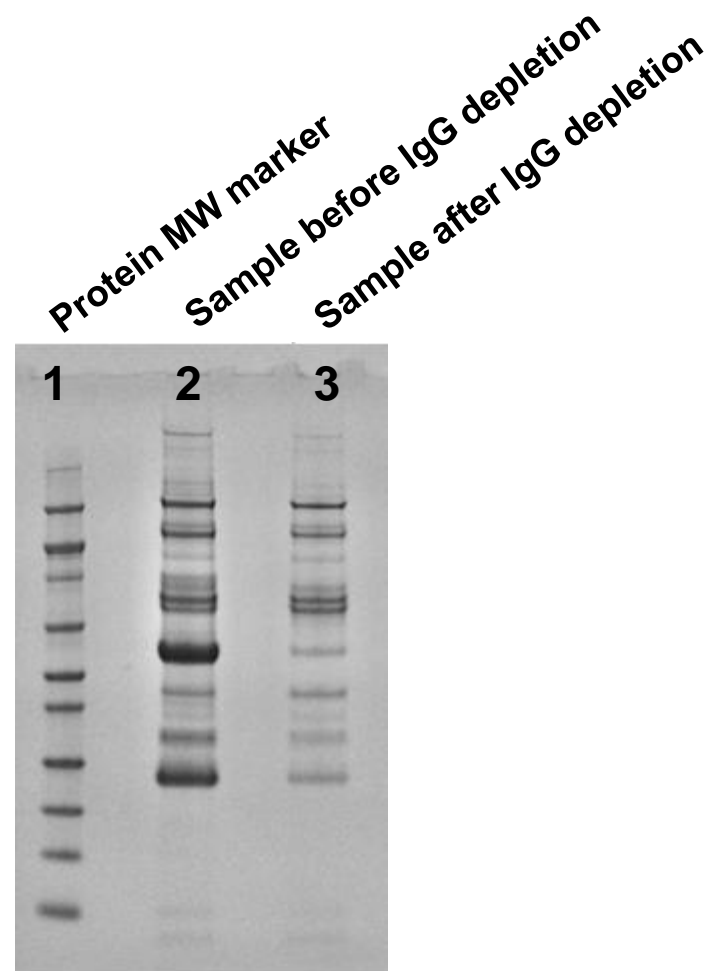

Figure S2

Hierarchical cluster analysis of peptides and PSMs identified by LC-MS/MS

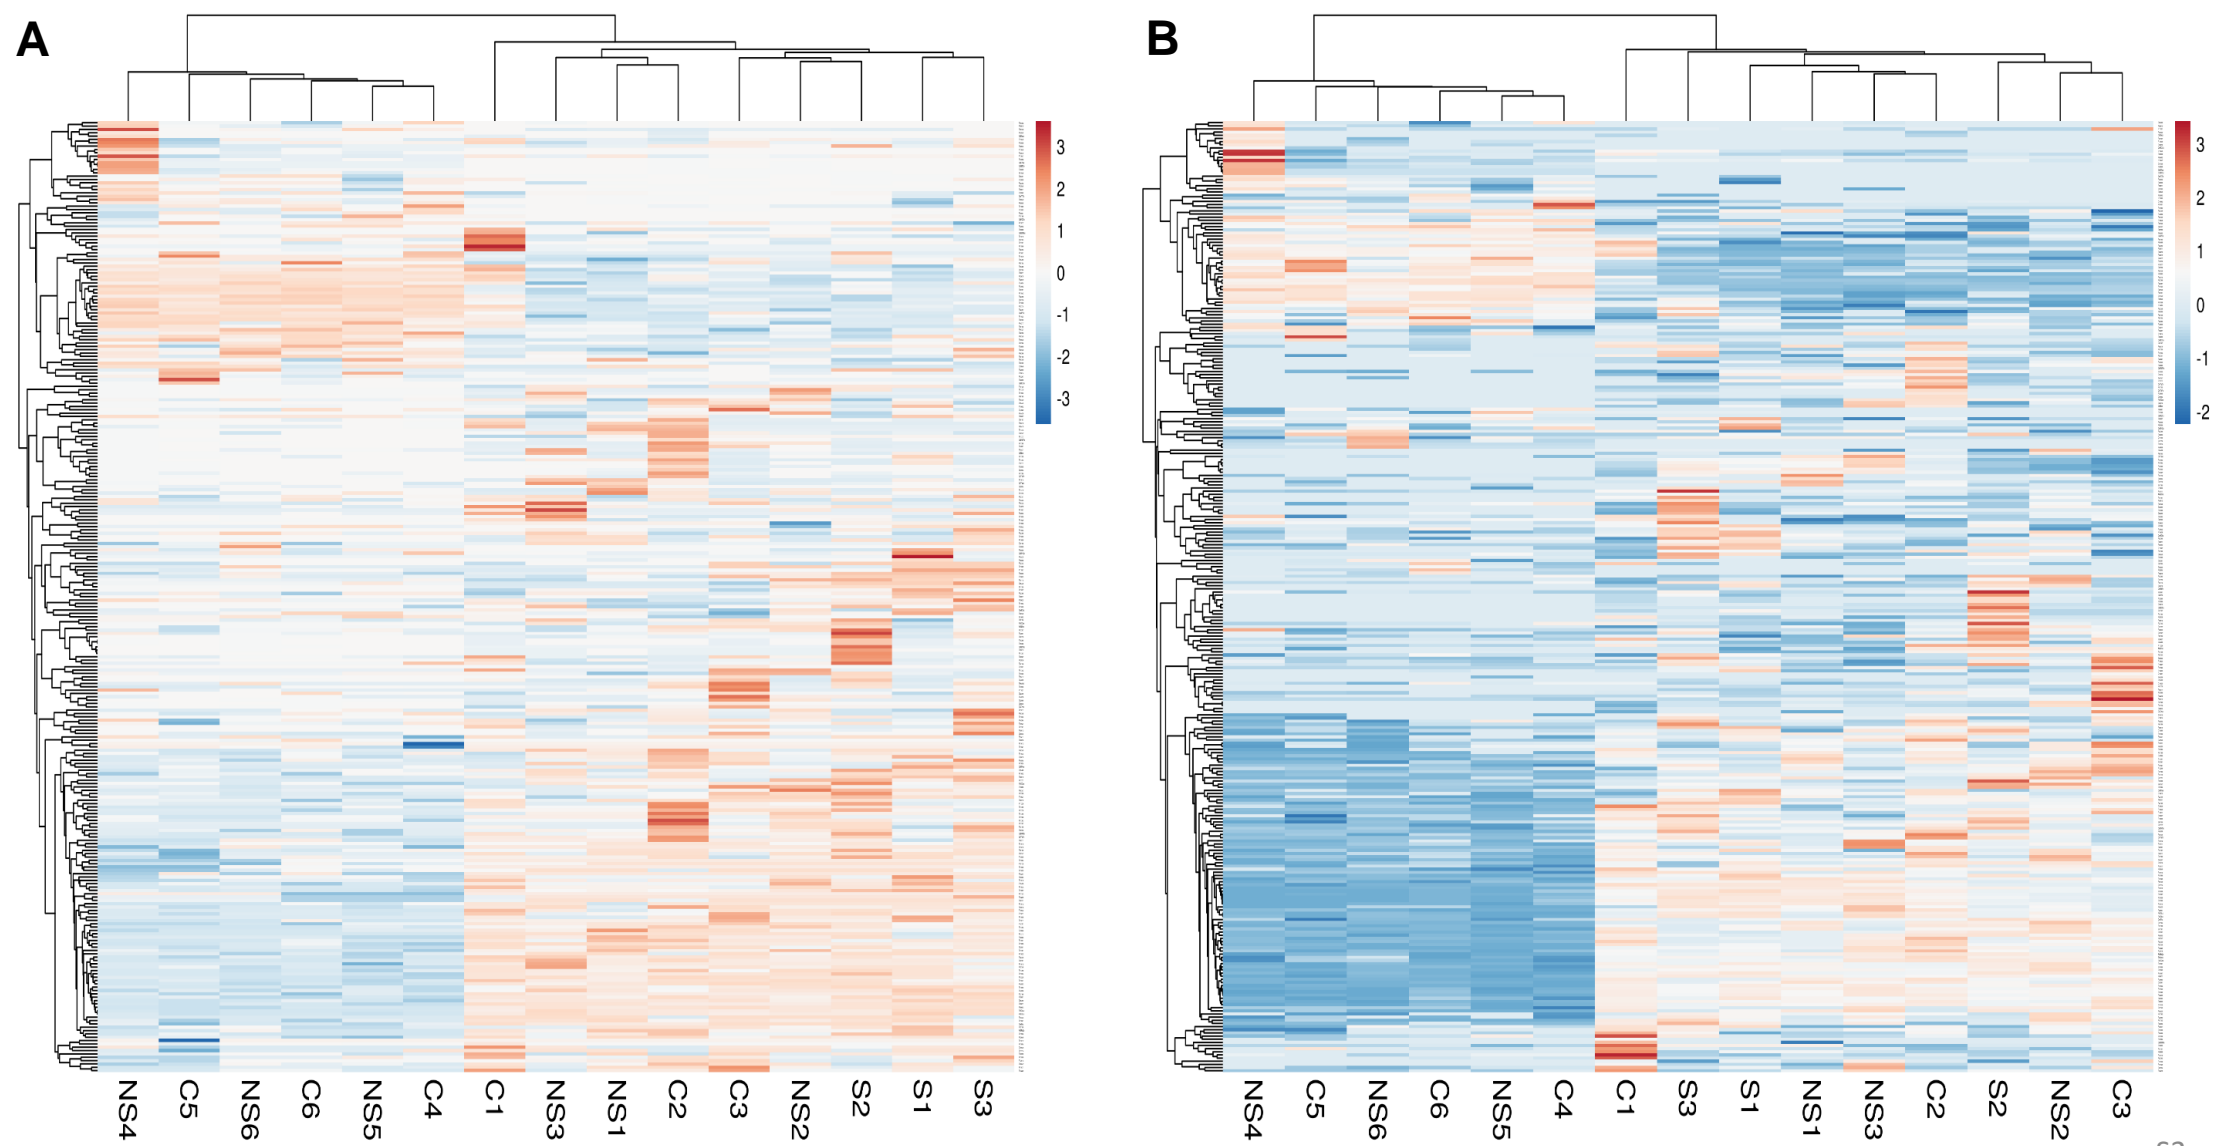

Figure S3

Hierarchical cluster analysis of significant peptides identified by LC-MS/MS

A Non-smokers vs. Smokers

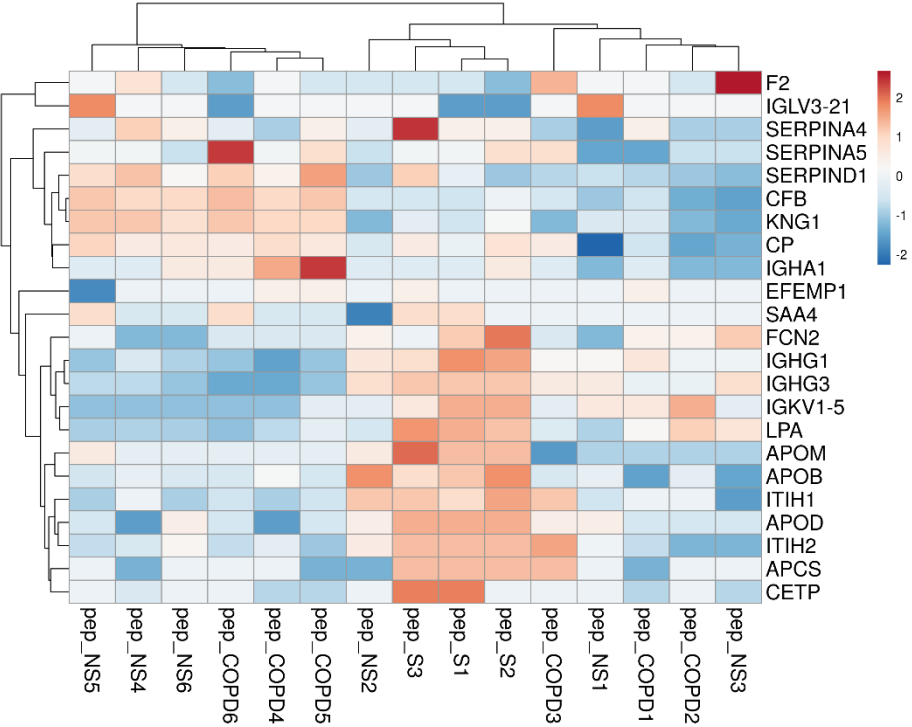

B Non-smokers vs. COPD

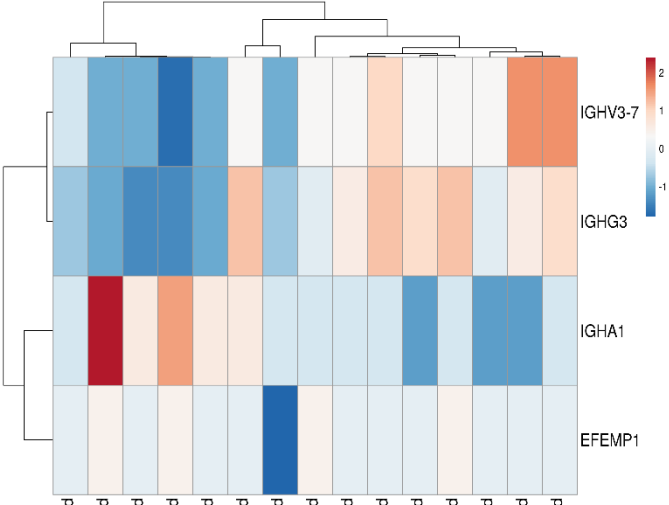

C Smokers vs. COPD

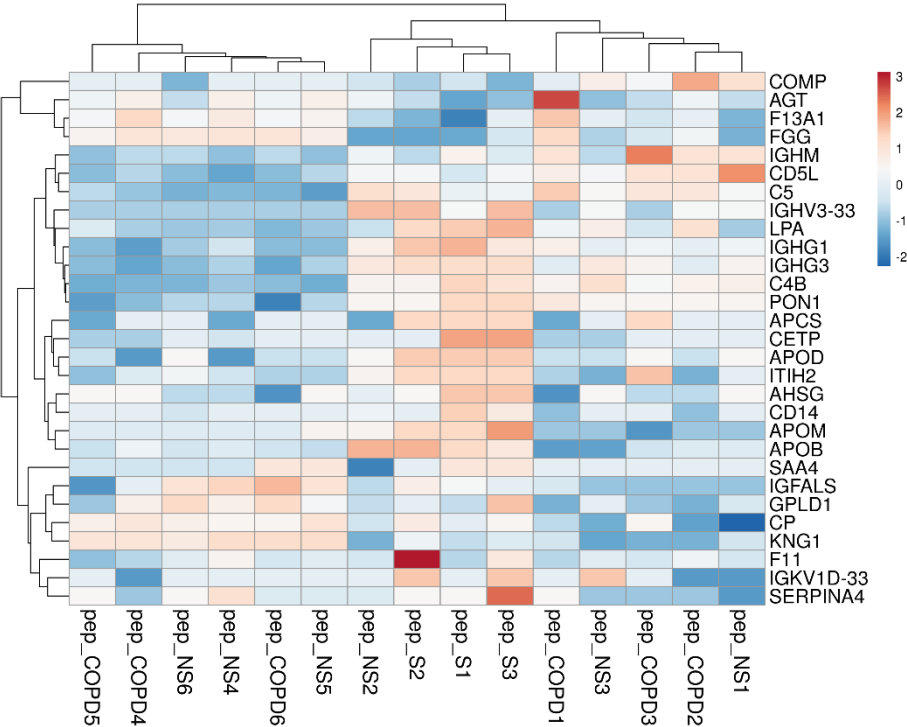

Figure S4

STIRNG: network analysis based significant peptides identified by LC-MS/MS

A Non-smokers vs. Smokers

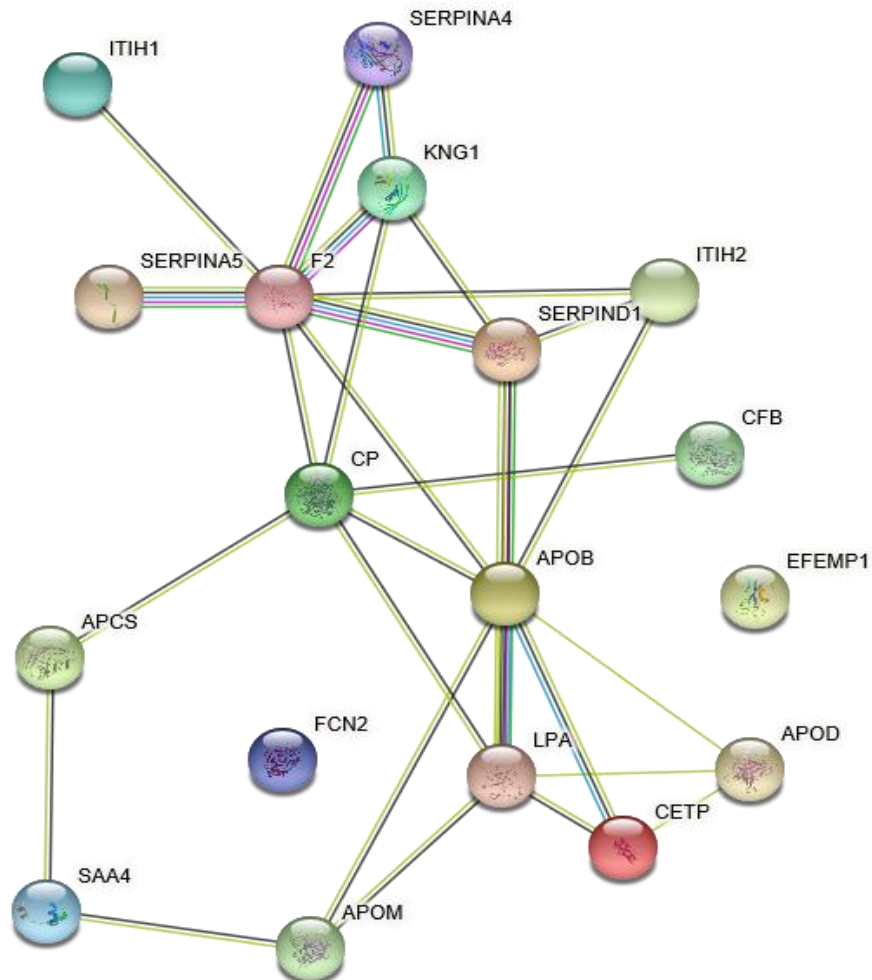

B Smokers vs. COPD

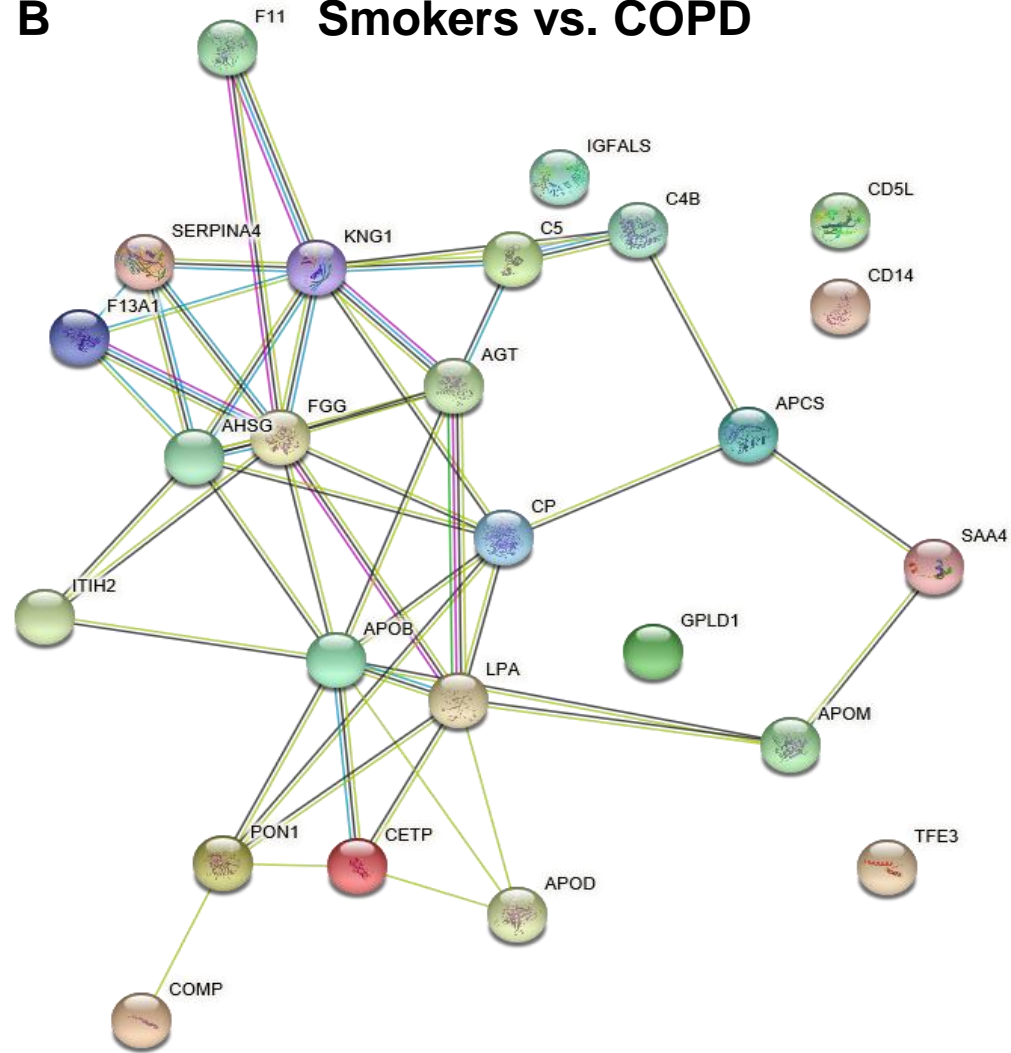

**Figure S5**

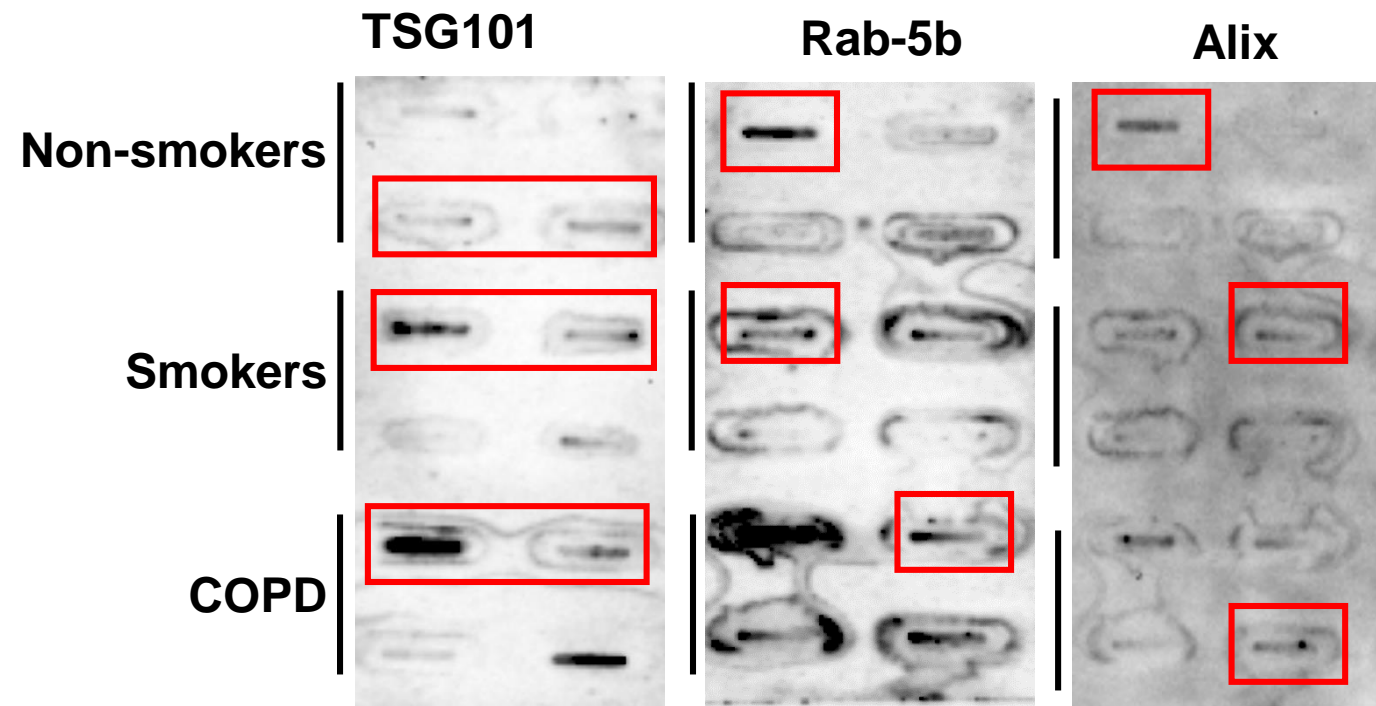

Supplement: Supplementary file 1 [file 15544481]
