# Supplementary material
Source: publisher figshare collection journal article supplement (https://acs.figshare.com/ndownloader/files/15544481)
Supplement: Supplementary file 2 [file 15544481]

## **Supporting Information**

# **Proteomic Analysis of Plasma-derived Extracellular Vesicles in Smokers and Patients with Chronic Obstructive Pulmonary Disease**

Isaac K. Sundar<sup>1\*</sup>, Dongmei Li<sup>2</sup>, and Irfan Rahman<sup>1</sup>

<sup>1</sup>Department of Environmental Medicine, and <sup>2</sup>Department of Clinical & Translational Research,  
University of Rochester Medical Center,  
Rochester, NY, USA

**Table S1. GO enrichment analysis for EV markers identified in this study that are common among Top 100 EV markers present in Vesiclepedia analyzed by STRING database.**

| <b>Biological Process (GO)</b> |                                 |                          |                             |
|--------------------------------|---------------------------------|--------------------------|-----------------------------|
| <b>Pathway ID</b>              | <b>Pathway description</b>      | <b>Count in gene set</b> | <b>False discovery rate</b> |
| GO:0042060                     | Wound healing                   | 15                       | 8.12E-12                    |
| GO:0002576                     | Platelet degranulation          | 9                        | 1.07E-11                    |
| GO:0030168                     | Platelet activation             | 11                       | 1.54E-11                    |
| GO:0050878                     | Regulation of body fluid levels | 14                       | 4.65E-11                    |
| GO:0007596                     | Blood coagulation               | 12                       | 1.61E-09                    |

| <b>Molecular Function (GO)</b> |                              |                          |                             |
|--------------------------------|------------------------------|--------------------------|-----------------------------|
| <b>Pathway ID</b>              | <b>Pathway description</b>   | <b>Count in gene set</b> | <b>False discovery rate</b> |
| GO:0005515                     | Protein binding              | 24                       | 1.61E-09                    |
| GO:0003723                     | RNA binding                  | 14                       | 2.92E-06                    |
| GO:0044822                     | Poly(A) RNA binding          | 12                       | 1.24E-05                    |
| GO:0032403                     | Protein complex binding      | 9                        | 1.76E-05                    |
| GO:0008092                     | Cytoskeletal protein binding | 8                        | 0.000156                    |

| <b>Cellular Component (GO)</b> |                            |                          |                             |
|--------------------------------|----------------------------|--------------------------|-----------------------------|
| <b>Pathway ID</b>              | <b>Pathway description</b> | <b>Count in gene set</b> | <b>False discovery rate</b> |
| GO:0070062                     | Extracellular exosome      | 28                       | 4.76E-23                    |
| GO:0005576                     | Extracellular region       | 28                       | 5.71E-18                    |
| GO:0072562                     | Blood microparticle        | 10                       | 1.99E-14                    |
| GO:0005925                     | Focal adhesion             | 12                       | 2.4E-12                     |
| GO:0005615                     | Extracellular space        | 16                       | 3.24E-11                    |

| <b>KEGG Pathways</b> |                                  |                          |                             |
|----------------------|----------------------------------|--------------------------|-----------------------------|
| <b>Pathway ID</b>    | <b>Pathway description</b>       | <b>Count in gene set</b> | <b>False discovery rate</b> |
| 04810                | Regulation of actin cytoskeleton | 6                        | 9.22E-05                    |
| 05132                | Salmonella infection             | 4                        | 0.000416                    |
| 05203                | Viral carcinogenesis             | 5                        | 0.000416                    |
| 04510                | Focal adhesion                   | 5                        | 0.000524                    |
| 00010                | Glycolysis / Gluconeogenesis     | 3                        | 0.00428                     |

**Table S2. GO enrichment analysis for EV markers identified in this study that are common among Top 100 Exosomal markers present in ExoCarta analyzed by STRING database.**

| <b>Biological Process (GO)</b> |                                 |                          |                             |
|--------------------------------|---------------------------------|--------------------------|-----------------------------|
| <b>Pathway ID</b>              | <b>Pathway description</b>      | <b>Count in gene set</b> | <b>False discovery rate</b> |
| GO:0030168                     | Platelet activation             | 9                        | 2.14E-08                    |
| GO:0002576                     | Platelet degranulation          | 7                        | 2.66E-08                    |
| GO:0042060                     | Wound healing                   | 11                       | 1.14E-07                    |
| GO:0016192                     | Vesicle-mediated transport      | 12                       | 6.93E-07                    |
| GO:0050878                     | Regulation of body fluid levels | 10                       | 1.35E-06                    |

| <b>Molecular Function (GO)</b> |                                 |                          |                             |
|--------------------------------|---------------------------------|--------------------------|-----------------------------|
| <b>Pathway ID</b>              | <b>Pathway description</b>      | <b>Count in gene set</b> | <b>False discovery rate</b> |
| GO:0005515                     | Protein binding                 | 21                       | 3.44E-09                    |
| GO:0003723                     | RNA binding                     | 14                       | 8.37E-08                    |
| GO:0044822                     | Poly(A) RNA binding             | 12                       | 7.09E-07                    |
| GO:1901363                     | Heterocyclic compound binding   | 19                       | 1.13E-05                    |
| GO:0097159                     | Organic cyclic compound binding | 19                       | 1.14E-05                    |

| <b>Cellular Component (GO)</b> |                            |                          |                             |
|--------------------------------|----------------------------|--------------------------|-----------------------------|
| <b>Pathway ID</b>              | <b>Pathway description</b> | <b>Count in gene set</b> | <b>False discovery rate</b> |
| GO:0070062                     | Extracellular exosome      | 23                       | 1.37E-18                    |
| GO:0005576                     | Extracellular region       | 23                       | 1.79E-14                    |
| GO:0043209                     | Myelin sheath              | 9                        | 9.37E-12                    |
| GO:0005925                     | Focal adhesion             | 9                        | 1.39E-08                    |
| GO:0042470                     | Melanosome                 | 6                        | 1.06E-07                    |

| <b>KEGG Pathways</b> |                              |                          |                             |
|----------------------|------------------------------|--------------------------|-----------------------------|
| <b>Pathway ID</b>    | <b>Pathway description</b>   | <b>Count in gene set</b> | <b>False discovery rate</b> |
| 05132                | Salmonella infection         | 4                        | 0.000547                    |
| 04145                | Phagosome                    | 4                        | 0.00255                     |
| 00010                | Glycolysis / Gluconeogenesis | 3                        | 0.0039                      |

**Table S3. GO enrichment analysis for EV markers identified in this study that are common among EV markers present in Plasma Proteome Database analyzed by STRING database.**

| <b>Biological Process (GO)</b> |                            |                          |                             |
|--------------------------------|----------------------------|--------------------------|-----------------------------|
| <b>Pathway ID</b>              | <b>Pathway description</b> | <b>Count in gene set</b> | <b>False discovery rate</b> |
| GO:0072376                     | Protein activation cascade | 31                       | 2.14E-49                    |
| GO:0006956                     | Complement activation      | 24                       | 7.68E-40                    |
| GO:0002576                     | Platelet degranulation     | 25                       | 5.37E-33                    |
| GO:0006950                     | Response to stress         | 78                       | 1.12E-32                    |
| GO:0016192                     | Vesicle-mediated transport | 51                       | 4.41E-31                    |

| <b>Molecular Function (GO)</b> |                                              |                          |                             |
|--------------------------------|----------------------------------------------|--------------------------|-----------------------------|
| <b>Pathway ID</b>              | <b>Pathway description</b>                   | <b>Count in gene set</b> | <b>False discovery rate</b> |
| GO:0004866                     | Endopeptidase inhibitor activity             | 19                       | 1.33E-16                    |
| GO:0061134                     | Peptidase regulator activity                 | 20                       | 1.33E-16                    |
| GO:0005515                     | Protein binding                              | 64                       | 1.35E-12                    |
| GO:0004857                     | Enzyme inhibitor activity                    | 20                       | 2.13E-12                    |
| GO:0004867                     | Serine-type endopeptidase inhibitor activity | 12                       | 9.69E-11                    |

| <b>Cellular Component (GO)</b> |                            |                          |                             |
|--------------------------------|----------------------------|--------------------------|-----------------------------|
| <b>Pathway ID</b>              | <b>Pathway description</b> | <b>Count in gene set</b> | <b>False discovery rate</b> |
| GO:0072562                     | Blood microparticle        | 71                       | 3.43E-104                   |
| GO:0005615                     | Extracellular space        | 87                       | 8.74E-79                    |
| GO:0044421                     | Extracellular region part  | 107                      | 5.52E-67                    |
| GO:0070062                     | Extracellular exosome      | 98                       | 5.38E-65                    |
| GO:0005576                     | Extracellular region       | 109                      | 8.24E-63                    |

| <b>KEGG Pathways</b> |                                     |                          |                             |
|----------------------|-------------------------------------|--------------------------|-----------------------------|
| <b>Pathway ID</b>    | <b>Pathway description</b>          | <b>Count in gene set</b> | <b>False discovery rate</b> |
| 04610                | Complement and coagulation cascades | 31                       | 2.84E-50                    |
| 05150                | Staphylococcus aureus infection     | 14                       | 3.16E-18                    |
| 05322                | Systemic lupus erythematosus        | 11                       | 6.46E-10                    |
| 05133                | Pertussis                           | 9                        | 1.58E-08                    |
| 05020                | Prion diseases                      | 6                        | 3.15E-06                    |

**Table S6. GO enrichment analysis for peptides identified in this study that are significantly different among non-smokers vs. smokers analyzed by STRING database.**

| <b>Biological Process (GO)</b> |                                                  |                          |                             |
|--------------------------------|--------------------------------------------------|--------------------------|-----------------------------|
| <b>Pathway ID</b>              | <b>Pathway description</b>                       | <b>Count in gene set</b> | <b>False discovery rate</b> |
| GO:0045861                     | Negative regulation of proteolysis               | 8                        | 2.21E-06                    |
| GO:0010951                     | Negative regulation of endopeptidase activity    | 7                        | 2.31E-06                    |
| GO:0051346                     | Negative regulation of hydrolase activity        | 8                        | 2.31E-06                    |
| GO:0051248                     | Negative regulation of protein metabolic process | 10                       | 3.79E-06                    |
| GO:0030162                     | Regulation of proteolysis                        | 9                        | 5.51E-06                    |

| <b>Molecular Function (GO)</b> |                                              |                          |                             |
|--------------------------------|----------------------------------------------|--------------------------|-----------------------------|
| <b>Pathway ID</b>              | <b>Pathway description</b>                   | <b>Count in gene set</b> | <b>False discovery rate</b> |
| GO:0004866                     | Endopeptidase inhibitor activity             | 7                        | 7.58E-08                    |
| GO:0004867                     | Serine-type endopeptidase inhibitor activity | 5                        | 8.75E-06                    |
| GO:0008201                     | Heparin binding                              | 5                        | 7.54E-05                    |
| GO:0001848                     | Complement binding                           | 2                        | 0.0179                      |
| GO:0005319                     | Lipid transporter activity                   | 3                        | 0.0179                      |

| <b>Cellular Component (GO)</b> |                             |                          |                             |
|--------------------------------|-----------------------------|--------------------------|-----------------------------|
| <b>Pathway ID</b>              | <b>Pathway description</b>  | <b>Count in gene set</b> | <b>False discovery rate</b> |
| GO:0005615                     | Extracellular space         | 17                       | 2.65E-17                    |
| GO:0072562                     | Blood microparticle         | 8                        | 1.36E-11                    |
| GO:0070062                     | Extracellular exosome       | 16                       | 1.88E-10                    |
| GO:0005576                     | Extracellular region        | 17                       | 3.63E-09                    |
| GO:0034358                     | Plasma lipoprotein particle | 4                        | 3.71E-06                    |

| <b>KEGG Pathways</b> |                                     |                          |                             |
|----------------------|-------------------------------------|--------------------------|-----------------------------|
| <b>Pathway ID</b>    | <b>Pathway description</b>          | <b>Count in gene set</b> | <b>False discovery rate</b> |
| 4610                 | Complement and coagulation cascades | 5                        | 8.31E-07                    |

**Table S7. GO enrichment analysis for peptides identified in this study that are significantly different among smokers vs. COPD analyzed by STRING database.**

| <b>Biological Process (GO)</b> |                                                      |                          |                             |
|--------------------------------|------------------------------------------------------|--------------------------|-----------------------------|
| <b>Pathway ID</b>              | <b>Pathway description</b>                           | <b>Count in gene set</b> | <b>False discovery rate</b> |
| GO:0010951                     | Negative regulation of endopeptidase activity        | 7                        | 2.43E-05                    |
| GO:0051346                     | Negative regulation of hydrolase activity            | 8                        | 2.43E-05                    |
| GO:0052548                     | Regulation of endopeptidase activity                 | 8                        | 2.43E-05                    |
| GO:1903034                     | Regulation of response to wounding                   | 8                        | 2.43E-05                    |
| GO:0032102                     | Negative regulation of response to external stimulus | 6                        | 0.000441                    |

| <b>Molecular Function (GO)</b> |                                  |                          |                             |
|--------------------------------|----------------------------------|--------------------------|-----------------------------|
| <b>Pathway ID</b>              | <b>Pathway description</b>       | <b>Count in gene set</b> | <b>False discovery rate</b> |
| GO:0004866                     | Endopeptidase inhibitor activity | 7                        | 1.09E-06                    |
| GO:0008201                     | Heparin binding                  | 5                        | 0.000629                    |
| GO:0004857                     | enzyme inhibitor activity        | 6                        | 0.00147                     |

| <b>Cellular Component (GO)</b> |                            |                          |                             |
|--------------------------------|----------------------------|--------------------------|-----------------------------|
| <b>Pathway ID</b>              | <b>Pathway description</b> | <b>Count in gene set</b> | <b>False discovery rate</b> |
| GO:0005615                     | Extracellular space        | 22                       | 1.90E-21                    |
| GO:0072562                     | Blood microparticle        | 10                       | 2.26E-14                    |
| GO:0070062                     | Extracellular exosome      | 20                       | 1.03E-11                    |
| GO:0031988                     | Membrane-bounded vesicle   | 21                       | 2.05E-11                    |
| GO:0005576                     | Extracellular region       | 22                       | 8.73E-11                    |

| <b>KEGG Pathways</b> |                                     |                          |                             |
|----------------------|-------------------------------------|--------------------------|-----------------------------|
| <b>Pathway ID</b>    | <b>Pathway description</b>          | <b>Count in gene set</b> | <b>False discovery rate</b> |
| 4610                 | Complement and coagulation cascades | 6                        | 5.21E-08                    |
| 5150                 | Staphylococcus aureus infection     | 3                        | 0.00463                     |
| 5133                 | Pertussis                           | 3                        | 0.00766                     |
