# Supplementary material
Source: publisher figshare collection journal article supplement (https://acs.figshare.com/ndownloader/files/15544481)
Supplement: Supplementary file 3 [file 15544481]

Archive with 6 entries (6 files):
- Revised Support Information ACS Omega/Table S8..xlsx
- Revised Support Information ACS Omega/Table S9..xlsx
- Revised Support Information ACS Omega/Table S4..xlsx
- Revised Support Information ACS Omega/Table S5..xlsx
- Revised Support Information ACS Omega/Supplementary Figures - 1-5.pdf
- Revised Support Information ACS Omega/Supplementary Tables S1-3; S6-7.pdf
