# Supplementary material
Source: publisher figshare collection journal article supplement (https://acs.figshare.com/ndownloader/files/15544481)
Supplement: Supplementary file 3 [file 15544481 › Revised Support Information ACS Omega/Table S4..xlsx]

## Sheet: Non-smokers vs. Smokers
	Accession	Gene Symbol	Description.x	pep_COPD1	pep_COPD2	pep_COPD3	pep_NS1	pep_NS2	pep_NS3	pep_S1	pep_S2	pep_S3	pep_COPD4	pep_COPD5	pep_COPD6	pep_NS4	pep_NS5	pep_NS6	nonSC_coef	SvsC_coef	SnonS_coef	nonSC_t	SvsC_t	SnonS_t	nonSC_P	SvsC_P	SnonS_P	nonSC_lods	SvsC_lods	SnonS_lods
25	O95445	APOM	Apolipoprotein M OS=Homo sapiens GN=APOM PE=1 SV=2 - [APOM_HUMAN]	2	2	1	2	4	2	5	5	6	3	3	3	3	4	3	0.666667	3.5	2.83333	1.74761	6.9356	5.61453	0.107222	1.99e-05	0.000134341	-4.26056	3.00603	1.39468
26	P00450	CP	Ceruloplasmin OS=Homo sapiens GN=CP PE=1 SV=1 - [CERU_HUMAN]	27	21	35	15	28	22	31	37	35	38	36	35	35	39	36	-2.83333	8.25	11.0833	-1.06086	2.33504	3.13698	0.310584	0.0386347	0.00902317	-4.95569	-4.68518	-2.59823
29	P00734	F2	Prothrombin OS=Homo sapiens GN=F2 PE=1 SV=2 - [THRB_HUMAN]	29	28	31	29	28	33	28	27	28	29	28	27	30	29	28	0.833333	-1.58333	-2.41667	1.00998	-1.45059	-2.21406	0.333341	0.173688	0.0479204	-4.99734	-6.04741	-4.15135
36	P00751	CFB	Complement factor B OS=Homo sapiens GN=CFB PE=1 SV=2 - [CFAB_HUMAN]	11	5	12	8	12	4	11	16	12	24	26	27	24	26	24	-1.16667	3.75	4.91667	-0.7553	1.83521	2.40616	0.465298	0.0925241	0.0340111	-5.17991	-5.49706	-3.83857
44	P01042	KNG1	Kininogen-1 OS=Homo sapiens GN=KNG1 PE=1 SV=2 - [KNG1_HUMAN]	8	4	4	8	4	3	7	11	9	15	15	16	16	16	14	-0.166667	3.75	3.91667	-0.162732	2.76781	2.89082	0.873562	0.0176728	0.0141262	-5.41207	-3.92858	-3.02112
48	P01596	IGKV1-5	Ig kappa chain V-I region CAR OS=Homo sapiens PE=1 SV=1 - [KV104_HUMAN]	3	4	2	3	2	2	4	4	3	1	2	1	1	1	1	-0.5	0.75	1.25	-1.45016	1.64433	2.74054	0.173807	0.127217	0.0185715	-4.58833	-5.78013	-3.27759
116	P01857	IGHG1	Ig gamma-1 chain C region OS=Homo sapiens GN=IGHG1 PE=1 SV=1 - [IGHG1_HUMAN]	24	21	22	22	24	21	29	28	25	14	16	16	19	16	17	1	5.5	4.5	1.10184	4.581	3.74809	0.293119	0.000708863	0.00300033	-4.92098	-0.68199	-1.55096
118	P01860	IGHG3	Ig gamma-3 chain C region OS=Homo sapiens GN=IGHG3 PE=1 SV=2 - [IGHG3_HUMAN]	18	18	20	20	21	21	22	22	22	14	15	14	16	16	15	1.66667	3.16667	1.5	4.36902	6.27507	2.9724	0.00101527	5.02e-05	0.0121753	-1.03259	2.05006	-2.88124
121	P01876	IGHA1	Ig alpha-1 chain C region OS=Homo sapiens GN=IGHA1 PE=1 SV=2 - [IGHA1_HUMAN]	17	16	17	16	17	16	17	18	17	19	20	18	17	17	18	-1	0.333333	1.33333	-2.39328	0.603051	2.4122	0.0348066	0.558212	0.0336439	-3.46537	-6.89656	-3.8286
136	P02743	APCS	Serum amyloid P-component OS=Homo sapiens GN=APCS PE=1 SV=2 - [SAMP_HUMAN]	6	7	8	7	6	7	8	8	8	7	6	7	6	7	7	-0.166667	1.08333	1.25	-0.483386	2.37514	2.74054	0.637918	0.0359583	0.0185715	-5.32213	-4.61669	-3.27759
159	P04114	APOB	Apolipoprotein B-100 OS=Homo sapiens GN=APOB PE=1 SV=2 - [APOB_HUMAN]	203	249	239	251	318	205	300	318	288	263	238	239	251	236	242	12	63.8333	51.8333	0.728495	2.92937	2.37868	0.480922	0.0131682	0.0357307	-5.19646	-3.63899	-3.88383
177	P05090	APOD	Apolipoprotein D OS=Homo sapiens GN=APOD PE=1 SV=1 - [APOD_HUMAN]	5	5	6	6	6	5	7	7	7	4	5	5	4	5	6	0.333333	1.66667	1.33333	0.976774	3.69186	2.95349	0.348835	0.00331639	0.0126021	-5.02363	-2.25741	-2.9137
178	P05154	SERPINA5	Plasma serine protease inhibitor OS=Homo sapiens GN=SERPINA5 PE=1 SV=3 - [IPSP_HUMAN]	1	2	4	1	2	2	3	4	3	3	4	6	3	3	2	-1.16667	0.75	1.91667	-1.9681	0.956409	2.44416	0.0737059	0.358592	0.0317649	-3.99871	-6.61481	-3.77574
183	P05546	SERPIND1	Heparin cofactor 2 OS=Homo sapiens GN=SERPIND1 PE=1 SV=3 - [HEP2_HUMAN]	7	6	7	8	6	5	11	6	18	14	21	18	19	17	13	-0.833333	4.75	5.58333	-0.442381	1.90613	2.24054	0.666441	0.0819938	0.0457219	-5.33847	-5.38752	-4.10877
199	P08519	LPA	Apolipoprotein(a) OS=Homo sapiens GN=LPA PE=1 SV=1 - [APOA_HUMAN]	23	36	14	7	12	30	41	38	45	8	17	3	7	6	6	-5.5	18.25	23.75	-1.23526	3.09843	4.0322	0.241439	0.0096787	0.00181762	-4.80115	-3.33367	-1.07266
219	P11597	CETP	Cholesteryl ester transfer protein OS=Homo sapiens GN=CETP PE=1 SV=2 - [CETP_HUMAN]	1	3	NA	NA	3	1	8	3	8	1	1	NA	2	NA	3	0.75	4.70833	3.95833	0.613849	3.23768	2.63045	0.557543	0.0130816	0.0320016	-5.11351	-3.329	-3.54692
237	P19823	ITIH2	Inter-alpha-trypsin inhibitor heavy chain H2 OS=Homo sapiens GN=ITIH2 PE=1 SV=2 - [ITIH2_HUMAN]	32	30	41	35	37	30	40	40	40	34	31	32	33	32	36	0.5	6.08333	5.58333	0.279521	2.57079	2.35949	0.784822	0.0252729	0.0369807	-5.38947	-4.27727	-3.91533
238	P19827	ITIH1	Inter-alpha-trypsin inhibitor heavy chain H1 OS=Homo sapiens GN=ITIH1 PE=1 SV=3 - [ITIH1_HUMAN]	26	26	30	24	30	21	29	31	30	23	24	24	26	23	23	-1	3.33333	4.33333	-0.718359	1.81009	2.35312	0.486913	0.0965386	0.0374049	-5.20257	-5.5353	-3.92577
254	P29622	SERPINA4	Kallistatin OS=Homo sapiens GN=SERPINA4 PE=1 SV=3 - [KAIN_HUMAN]	8	6	6	5	7	6	8	8	11	6	8	7	9	7	8	0.166667	2.75	2.58333	0.23882	2.97876	2.79823	0.815459	0.0120351	0.0167209	-5.39869	-3.54998	-3.17937
259	P35542	SAA4	Serum amyloid A-4 protein OS=Homo sapiens GN=SAA4 PE=1 SV=2 - [SAA4_HUMAN]	NA	NA	NA	NA	1	NA	3	NA	3	2	2	3	2	3	2	1.49e-16	2	2	3.69e-16	2.74468	2.912	1	0.0369047	0.0299747	-5.16439	-3.75055	-3.18129
286	P80748	IGLV3-21	Ig lambda chain V-III region LOI OS=Homo sapiens PE=1 SV=1 - [LV302_HUMAN]	3	3	3	4	3	3	2	2	3	3	3	2	3	4	3	0.5	-0.583333	-1.08333	1.76636	-1.55779	-2.89303	0.103908	0.146436	0.0140695	-4.23883	-5.90221	-3.01734
298	Q12805	EFEMP1	EGF-containing fibulin-like extracellular matrix protein 1 OS=Homo sapiens GN=EFEMP1 PE=1 SV=2 - [FBLN3_HUMAN]	3	NA	NA	NA	NA	NA	NA	NA	3	3	3	NA	NA	2	NA	-1	4.15e-16	1	-11.9344	4.29e-15	9.87543	0.0193814	1	0.0255338	-4.11908	-6.48196	-3.15685
312	Q15485	FCN2	Ficolin-2 OS=Homo sapiens GN=FCN2 PE=1 SV=2 - [FCN2_HUMAN]	3	3	2	1	3	4	4	5	NA	2	2	2	1	NA	1	-0.444444	1.61111	2.05556	-0.880966	2.23044	2.90465	0.400145	0.0512434	0.0165853	-5.05741	-4.77309	-3.03233

## Sheet: Non-smokers vs. COPD
	Accession	Gene symbol	Description.x	pep_COPD1	pep_COPD2	pep_COPD3	pep_NS1	pep_NS2	pep_NS3	pep_S1	pep_S2	pep_S3	pep_COPD4	pep_COPD5	pep_COPD6	pep_NS4	pep_NS5	pep_NS6	nonSC_coef	SvsC_coef	SnonS_coef	nonSC_t	SvsC_t	SnonS_t	nonSC_P	SvsC_P	SnonS_P	nonSC_lods	SvsC_lods	SnonS_lods
110	P01781	IGHV3-7	Ig heavy chain V-III region GAL OS=Homo sapiens PE=1 SV=1 - [HV320_HUMAN]	4	4	4	6	6	4	5	4	4	1	2	2	3	2	2	1	0.166667	-0.833333	2.62141	0.330267	-1.65133	0.023058	0.747153	0.125763	-3.17118	-7.03122	-4.99984
118	P01860	IGHG3	Ig gamma-3 chain C region OS=Homo sapiens GN=IGHG3 PE=1 SV=2 - [IGHG3_HUMAN]	18	18	20	20	21	21	22	22	22	14	15	14	16	16	15	1.66667	3.16667	1.5	4.36902	6.27507	2.9724	0.00101527	5.02e-05	0.0121753	-1.03259	2.05006	-2.88124
121	P01876	IGHA1	Ig alpha-1 chain C region OS=Homo sapiens GN=IGHA1 PE=1 SV=2 - [IGHA1_HUMAN]	17	16	17	16	17	16	17	18	17	19	20	18	17	17	18	-1	0.333333	1.33333	-2.39328	0.603051	2.4122	0.0348066	0.558212	0.0336439	-3.46537	-6.89656	-3.8286
298	Q12805	EFEMP1	EGF-containing fibulin-like extracellular matrix protein 1 OS=Homo sapiens GN=EFEMP1 PE=1 SV=2 - [FBLN3_HUMAN]	3	NA	NA	NA	NA	NA	NA	NA	3	3	3	NA	NA	2	NA	-1	4.15e-16	1	-11.9344	4.29e-15	9.87543	0.0193814	1	0.0255338	-4.11908	-6.48196	-3.15685

## Sheet: Smokers vs. COPD
	Accession	Gene symbol	Description.x	pep_COPD1	pep_COPD2	pep_COPD3	pep_NS1	pep_NS2	pep_NS3	pep_S1	pep_S2	pep_S3	pep_COPD4	pep_COPD5	pep_COPD6	pep_NS4	pep_NS5	pep_NS6	nonSC_coef	SvsC_coef	SnonS_coef	nonSC_t	SvsC_t	SnonS_t	nonSC_P	SvsC_P	SnonS_P	nonSC_lods	SvsC_lods	SnonS_lods
17	O43866	CD5L	CD5 antigen-like OS=Homo sapiens GN=CD5L PE=1 SV=1 - [CD5L_HUMAN]	18	19	19	22	17	17	15	17	17	14	13	13	12	14	13	-0.166667	-2.41667	-2.25	-0.204932	-2.24626	-2.09134	0.841217	0.0452597	0.0594866	-5.40527	-4.83537	-4.3461
25	O95445	APOM	Apolipoprotein M OS=Homo sapiens GN=APOM PE=1 SV=2 - [APOM_HUMAN]	2	2	1	2	4	2	5	5	6	3	3	3	3	4	3	0.666667	3.5	2.83333	1.74761	6.9356	5.61453	0.107222	1.99e-05	0.000134341	-4.26056	3.00603	1.39468
26	P00450	CP	Ceruloplasmin OS=Homo sapiens GN=CP PE=1 SV=1 - [CERU_HUMAN]	27	21	35	15	28	22	31	37	35	38	36	35	35	39	36	-2.83333	8.25	11.0833	-1.06086	2.33504	3.13698	0.310584	0.0386347	0.00902317	-4.95569	-4.68518	-2.59823
28	P00488	F13A1	Coagulation factor XIII A chain OS=Homo sapiens GN=F13A1 PE=1 SV=4 - [F13A_HUMAN]	15	9	7	4	6	NA	1	4	NA	14	10	10	12	11	10	-2.55556	-6.72222	-4.16667	-1.53885	-2.82714	-1.78864	0.15656	0.0188781	0.105646	-4.47788	-3.79456	-4.72313
40	P01019	AGT	Angiotensinogen OS=Homo sapiens GN=AGT PE=1 SV=1 - [ANGT_HUMAN]	11	5	3	3	5	2	1	3	2	6	5	5	6	6	3	-1.66667	-3.66667	-2	-1.33857	-2.22609	-1.21423	0.206643	0.0469091	0.24907	-4.7017	-4.86918	-5.55239
43	P01031	C5	Complement C5 OS=Homo sapiens GN=C5 PE=1 SV=4 - [CO5_HUMAN]	94	87	87	80	90	81	77	87	78	63	67	60	61	56	59	-5.16667	-8.41667	-3.25	-2.18663	-2.69269	-1.03975	0.0503037	0.0202593	0.319879	-3.72807	-4.0622	-5.73741
44	P01042	KNG1	Kininogen-1 OS=Homo sapiens GN=KNG1 PE=1 SV=2 - [KNG1_HUMAN]	8	4	4	8	4	3	7	11	9	15	15	16	16	16	14	-0.166667	3.75	3.91667	-0.162732	2.76781	2.89082	0.873562	0.0176728	0.0141262	-5.41207	-3.92858	-3.02112
61	P01609	IGKV1D-33	Ig kappa chain V-I region Scw OS=Homo sapiens PE=1 SV=1 - [KV117_HUMAN]	2	1	2	1	2	3	2	3	3	1	2	2	2	2	2	0.333333	1	0.666667	0.976774	2.21512	1.47674	0.348835	0.047831	0.166669	-5.02363	-4.88753	-5.23426
102	P01771	IGHV3-33	Ig heavy chain V-III region HIL OS=Homo sapiens PE=1 SV=1 - [HV310_HUMAN]	1	2	1	2	3	2	2	3	3	1	1	1	1	1	1	0.5	1.08333	0.583333	1.76636	2.89303	1.55779	0.103908	0.0140695	0.146436	-4.23883	-3.70435	-5.12751
116	P01857	IGHG1	Ig gamma-1 chain C region OS=Homo sapiens GN=IGHG1 PE=1 SV=1 - [IGHG1_HUMAN]	24	21	22	22	24	21	29	28	25	14	16	16	19	16	17	1	5.5	4.5	1.10184	4.581	3.74809	0.293119	0.000708863	0.00300033	-4.92098	-0.68199	-1.55096
118	P01860	IGHG3	Ig gamma-3 chain C region OS=Homo sapiens GN=IGHG3 PE=1 SV=2 - [IGHG3_HUMAN]	18	18	20	20	21	21	22	22	22	14	15	14	16	16	15	1.66667	3.16667	1.5	4.36902	6.27507	2.9724	0.00101527	5.02e-05	0.0121753	-1.03259	2.05006	-2.88124
120	P01871	IGHM	Ig mu chain C region OS=Homo sapiens GN=IGHM PE=1 SV=3 - [IGHM_HUMAN]	29	29	32	29	27	25	28	25	26	25	24	25	24	24	25	-1.66667	-3	-1.33333	-1.94206	-2.6425	-1.17445	0.0770902	0.0221924	0.264027	-4.03031	-4.15103	-5.59656
134	P02679	FGG	Fibrinogen gamma chain OS=Homo sapiens GN=FGG PE=1 SV=3 - [FIBG_HUMAN]	33	22	15	4	2	10	3	2	14	30	25	30	30	27	29	-8.83333	-12.4167	-3.58333	-2.18674	-2.32359	-0.670565	0.0502941	0.0394341	0.515774	-3.72793	-4.70468	-6.04745
136	P02743	APCS	Serum amyloid P-component OS=Homo sapiens GN=APCS PE=1 SV=2 - [SAMP_HUMAN]	6	7	8	7	6	7	8	8	8	7	6	7	6	7	7	-0.166667	1.08333	1.25	-0.483386	2.37514	2.74054	0.637918	0.0359583	0.0185715	-5.32213	-4.61669	-3.27759
146	P02765	AHSG	Alpha-2-HS-glycoprotein OS=Homo sapiens GN=AHSG PE=1 SV=1 - [FETUA_HUMAN]	1	2	2	3	NA	3	4	3	4	3	3	1	2	3	2	0.592593	1.7037	1.11111	1.30162	2.95843	1.90352	0.220961	0.0136727	0.0848059	-4.71072	-3.6308	-4.62465
154	P03951	F11	Coagulation factor XI OS=Homo sapiens GN=F11 PE=1 SV=1 - [FA11_HUMAN]	3	6	4	4	4	5	3	15	8	3	2	4	7	5	5	1.33333	5	3.66667	0.833679	2.36326	1.73306	0.421486	0.0367321	0.109857	-5.12853	-4.63702	-4.88468
159	P04114	APOB	Apolipoprotein B-100 OS=Homo sapiens GN=APOB PE=1 SV=2 - [APOB_HUMAN]	203	249	239	251	318	205	300	318	288	263	238	239	251	236	242	12	63.8333	51.8333	0.728495	2.92937	2.37868	0.480922	0.0131682	0.0357307	-5.19646	-3.63899	-3.88383
177	P05090	APOD	Apolipoprotein D OS=Homo sapiens GN=APOD PE=1 SV=1 - [APOD_HUMAN]	5	5	6	6	6	5	7	7	7	4	5	5	4	5	6	0.333333	1.66667	1.33333	0.976774	3.69186	2.95349	0.348835	0.00331639	0.0126021	-5.02363	-2.25741	-2.9137
199	P08519	LPA	Apolipoprotein(a) OS=Homo sapiens GN=LPA PE=1 SV=1 - [APOA_HUMAN]	23	36	14	7	12	30	41	38	45	8	17	3	7	6	6	-5.5	18.25	23.75	-1.23526	3.09843	4.0322	0.241439	0.0096787	0.00181762	-4.80115	-3.33367	-1.07266
200	P08571	CD14	Monocyte differentiation antigen CD14 OS=Homo sapiens GN=CD14 PE=1 SV=2 - [CD14_HUMAN]	1	1	NA	NA	3	NA	5	NA	4	NA	NA	NA	NA	NA	2	2	3.5	1.5	3.60388	7.72422	2.63846	0.0501012	0.00867851	0.0953633	-4.01846	-1.65763	-3.87052
207	P0C0L5	C4B	Complement C4-B OS=Homo sapiens GN=C4B PE=1 SV=2 - [CO4B_HUMAN]	98	99	96	100	98	106	109	98	105	75	73	76	78	73	75	2.16667	5.58333	3.41667	1.1348	2.21056	1.35273	0.279619	0.0482181	0.202208	-4.89233	-4.89513	-5.39008
219	P11597	CETP	Cholesteryl ester transfer protein OS=Homo sapiens GN=CETP PE=1 SV=2 - [CETP_HUMAN]	1	3	NA	NA	3	1	8	3	8	1	1	NA	2	NA	3	0.75	4.70833	3.95833	0.613849	3.23768	2.63045	0.557543	0.0130816	0.0320016	-5.11351	-3.329	-3.54692
237	P19823	ITIH2	Inter-alpha-trypsin inhibitor heavy chain H2 OS=Homo sapiens GN=ITIH2 PE=1 SV=2 - [ITIH2_HUMAN]	32	30	41	35	37	30	40	40	40	34	31	32	33	32	36	0.5	6.08333	5.58333	0.279521	2.57079	2.35949	0.784822	0.0252729	0.0369807	-5.38947	-4.27727	-3.91533
251	P27169	PON1	Serum paraoxonase/arylesterase 1 OS=Homo sapiens GN=PON1 PE=1 SV=3 - [PON1_HUMAN]	13	12	12	12	12	12	14	12	14	8	7	6	9	9	9	0.833333	1.58333	0.75	1.59232	2.28699	1.08331	0.138482	0.0420953	0.30092	-4.43591	-4.76673	-5.69337
254	P29622	SERPINA4	Kallistatin OS=Homo sapiens GN=SERPINA4 PE=1 SV=3 - [KAIN_HUMAN]	8	6	6	5	7	6	8	8	11	6	8	7	9	7	8	0.166667	2.75	2.58333	0.23882	2.97876	2.79823	0.815459	0.0120351	0.0167209	-5.39869	-3.54998	-3.17937
259	P35542	SAA4	Serum amyloid A-4 protein OS=Homo sapiens GN=SAA4 PE=1 SV=2 - [SAA4_HUMAN]	NA	NA	NA	NA	1	NA	3	NA	3	2	2	3	2	3	2	1.49e-16	2	2	3.69e-16	2.74468	2.912	1	0.0369047	0.0299747	-5.16439	-3.75055	-3.18129
261	P35858	IGFALS	Insulin-like growth factor-binding protein complex acid labile subunit OS=Homo sapiens GN=IGFALS PE=1 SV=1 - [ALS_HUMAN]	7	5	5	5	6	5	9	10	8	8	3	13	12	11	11	1.5	4.25	2.75	1.08228	2.31803	1.4999	0.301358	0.0398273	0.160655	-4.93767	-4.71412	-5.20413
269	P49747	COMP	Cartilage oligomeric matrix protein OS=Homo sapiens GN=COMP PE=1 SV=2 - [COMP_HUMAN]	4	9	5	7	3	6	3	2	1	NA	NA	NA	NA	NA	1	-0.666667	-4	-3.33333	-0.418069	-2.50841	-1.87411	0.689423	0.0431882	0.106505	-5.09701	-4.51454	-4.58715
284	P80108	GPLD1	Phosphatidylinositol-glycan-specific phospholipase D OS=Homo sapiens GN=GPLD1 PE=1 SV=3 - [PHLD_HUMAN]	1	1	2	4	3	NA	3	NA	10	7	2	9	7	6	9	1.7037	4.98148	3.27778	1.14297	2.33412	1.56763	0.281126	0.0431104	0.149743	-4.85272	-4.60664	-5.02168
