# Supplementary material
Source: publisher figshare collection journal article supplement (https://acs.figshare.com/ndownloader/files/15544481)
Supplement: Supplementary file 3 [file 15544481 › Revised Support Information ACS Omega/Table S5..xlsx]

## Sheet: Non-smokers vs. Smokers
	Accession	Gene symbol	Description.x	PSM_COPD1	PSM_COPD2	PSM_COPD3	PSM_NS1	PSM_NS2	PSM_NS3	PSM_S1	PSM_S2	PSM_S3	PSM_COPD4	PSM_COPD5	PSM_COPD6	PSM_NS4	PSM_NS5	PSM_NS6	nonSC_coef	SvsC_coef	SnonS_coef	nonSC_t	SvsC_t	SnonS_t	nonSC_P	SvsC_P	SnonS_P	nonSC_lods	SvsC_lods	SnonS_lods
14	O14791	APOL1	Apolipoprotein L1 OS=Homo sapiens GN=APOL1 PE=1 SV=5 - [APOL1_HUMAN]	13	18	19	20	16	11	9	13	12	9	5	5	5	8	6	-0.5	-5.08333	-4.58333	-0.316598	-2.43315	-2.19382	0.757213	0.0323182	0.0495723	-4.66039	-4.26902	-4.64587
17	O43866	CD5L	CD5 antigen-like OS=Homo sapiens GN=CD5L PE=1 SV=1 - [CD5L_HUMAN]	44	45	62	53	40	37	26	26	25	22	18	16	15	18	16	-4.66667	-23.5	-18.8333	-1.38948	-5.28927	-4.23892	0.19096	0.000219925	0.00125743	-4.54511	0.712207	-1.03358
25	O95445	APOM	Apolipoprotein M OS=Homo sapiens GN=APOM PE=1 SV=2 - [APOM_HUMAN]	2	2	1	2	4	2	5	5	6	3	3	3	3	4	3	0.666667	3.5	2.83333	1.73538	6.88707	5.57525	0.109319	2.08e-05	0.000140484	-4.48993	3.10199	1.18491
26	P00450	CP	Ceruloplasmin OS=Homo sapiens GN=CP PE=1 SV=1 - [CERU_HUMAN]	39	24	45	19	40	30	41	59	52	55	46	55	55	56	48	-2.66667	16.5	19.1667	-0.571711	2.67407	3.10624	0.578504	0.0208886	0.00949737	-4.64431	-3.8499	-3.05419
36	P00751	CFB	Complement factor B OS=Homo sapiens GN=CFB PE=1 SV=2 - [CFAB_HUMAN]	13	5	13	8	13	4	12	18	12	31	33	33	30	32	29	-2	3.66667	5.66667	-1.09742	1.52088	2.35045	0.294872	0.155257	0.0374971	-4.58713	-5.69708	-4.38354
48	P01596	IGKV1-5	Ig kappa chain V-I region CAR OS=Homo sapiens PE=1 SV=1 - [KV104_HUMAN]	22	17	13	17	11	19	27	23	17	4	3	3	4	2	4	-0.833333	5.41667	6.25	-0.427148	2.09881	2.4217	0.677148	0.0586126	0.0329913	-4.65449	-4.82854	-4.26213
87	P01717	IGLV3-25	Ig lambda chain V-IV region Hil OS=Homo sapiens PE=1 SV=1 - [LV403_HUMAN]	6	7	7	5	5	6	6	8	8	3	3	2	3	2	3	-0.666667	1	1.66667	-1.50656	1.70828	2.84713	0.158848	0.114364	0.0152384	-4.52692	-5.43282	-3.51769
116	P01857	IGHG1	Ig gamma-1 chain C region OS=Homo sapiens GN=IGHG1 PE=1 SV=1 - [IGHG1_HUMAN]	485	436	423	403	575	415	588	588	521	78	77	100	118	70	132	19	119	100	0.692022	3.27638	2.75326	0.502636	0.00696786	0.0180835	-4.63384	-2.7729	-3.68421
120	P01871	IGHM	Ig mu chain C region OS=Homo sapiens GN=IGHM PE=1 SV=3 - [IGHM_HUMAN]	225	274	401	254	285	216	175	136	133	203	184	143	94	199	96	-47.6667	-151.667	-104	-1.64301	-3.95182	-2.70982	0.127377	0.0020758	0.0195727	-4.50504	-1.56148	-3.76091
136	P02743	APCS	Serum amyloid P-component OS=Homo sapiens GN=APCS PE=1 SV=2 - [SAMP_HUMAN]	6	7	9	7	7	7	8	9	9	7	7	8	6	7	7	-0.5	1.25	1.75	-1.12303	2.12232	2.97125	0.28429	0.0562406	0.0121496	-4.58368	-4.79026	-3.29624
137	P02745	C1QA	Complement C1q subcomponent subunit A OS=Homo sapiens GN=C1QA PE=1 SV=2 - [C1QA_HUMAN]	37	36	27	19	24	30	18	20	17	5	3	4	5	3	6	-4.16667	-12.5833	-8.41667	-1.71969	-3.9259	-2.62593	0.112215	0.00217291	0.022799	-4.49251	-1.60751	-3.90831
139	P02747	C1QC	Complement C1q subcomponent subunit C OS=Homo sapiens GN=C1QC PE=1 SV=3 - [C1QC_HUMAN]	20	25	16	14	21	19	15	14	13	6	5	7	7	6	7	-0.833333	-5.58333	-4.75	-0.554003	-2.80587	-2.38709	0.590171	0.0164296	0.0351108	-4.6457	-3.61679	-4.32126
142	P02751	FN1	Fibronectin OS=Homo sapiens GN=FN1 PE=1 SV=4 - [FINC_HUMAN]	292	297	226	203	195	385	189	213	124	100	94	94	98	99	99	-4	-93	-89	-0.134337	-2.36103	-2.25948	0.895455	0.0367925	0.044116	-4.66637	-4.39222	-4.53673
146	P02765	AHSG	Alpha-2-HS-glycoprotein OS=Homo sapiens GN=AHSG PE=1 SV=1 - [FETUA_HUMAN]	1	2	2	3	NA	3	4	3	5	3	3	1	2	3	2	0.592593	2.03704	1.44444	1.17004	3.17967	2.22442	0.267815	0.00924473	0.0490551	-4.57856	-3.00544	-4.59216
159	P04114	APOB	Apolipoprotein B-100 OS=Homo sapiens GN=APOB PE=1 SV=2 - [APOB_HUMAN]	299	484	453	522	1040	340	856	958	852	717	488	489	480	430	461	57.1667	394.25	337.083	0.525924	2.74178	2.34422	0.608918	0.0184659	0.0379182	-4.64783	-3.73042	-4.3941
167	P04220	IGHM	Ig mu heavy chain disease protein OS=Homo sapiens PE=1 SV=1 - [MUCB_HUMAN]	164	206	303	173	217	152	126	96	90	174	152	109	61	171	70	-44	-120.5	-76.5	-1.71455	-3.54948	-2.25341	0.113179	0.00425158	0.0445955	-4.49335	-2.28089	-4.54687
177	P05090	APOD	Apolipoprotein D OS=Homo sapiens GN=APOD PE=1 SV=1 - [APOD_HUMAN]	7	6	7	10	10	7	12	11	11	7	6	7	6	7	10	1.66667	4.33333	2.66667	2.30284	4.52605	2.78526	0.0408319	0.000769316	0.017059	-4.39527	-0.558537	-3.62756
178	P05154	SERPINA5	Plasma serine protease inhibitor OS=Homo sapiens GN=SERPINA5 PE=1 SV=3 - [IPSP_HUMAN]	1	2	4	1	2	2	4	4	3	4	4	7	4	3	3	-1.16667	1.08333	2.25	-1.86539	1.30938	2.71948	0.0877896	0.215924	0.0192314	-4.46836	-5.97026	-3.74388
189	P06331	IGHV4-34	Ig heavy chain V-II region ARH-77 OS=Homo sapiens PE=4 SV=1 - [HV209_HUMAN]	11	16	22	8	14	12	23	17	20	2	5	4	3	2	4	-2.83333	4.75	7.58333	-1.53204	1.94154	3.09965	0.152507	0.0770507	0.00961215	-4.52289	-5.07948	-3.06603
199	P08519	LPA	Apolipoprotein(a) OS=Homo sapiens GN=LPA PE=1 SV=1 - [APOA_HUMAN]	30	59	21	7	18	50	94	77	91	9	19	3	8	7	7	-7.33333	52.8333	60.1667	-0.932041	5.07601	5.78057	0.370441	0.000309523	0.000102558	-4.6081	0.365151	1.5035
204	P09871	C1S	Complement C1s subcomponent OS=Homo sapiens GN=C1S PE=1 SV=1 - [C1S_HUMAN]	40	38	38	40	38	36	42	41	43	20	17	20	19	18	21	-0.166667	3.58333	3.75	-0.199225	3.2379	3.3885	0.84556	0.00747268	0.00568556	-4.66478	-2.84226	-2.5463
215	P10909	CLU	Clusterin OS=Homo sapiens GN=CLU PE=1 SV=1 - [CLUS_HUMAN]	16	13	13	13	15	12	15	17	16	11	10	12	11	11	11	-0.333333	2.16667	2.5	-0.504251	2.47766	2.85883	0.623592	0.0298249	0.0149165	-4.6494	-4.19241	-3.49688
219	P11597	CETP	Cholesteryl ester transfer protein OS=Homo sapiens GN=CETP PE=1 SV=2 - [CETP_HUMAN]	1	3	NA	NA	3	1	8	3	9	1	1	NA	2	NA	3	0.75	5.04167	4.29167	0.566106	3.19725	2.63015	0.587815	0.0137461	0.0318328	-4.6282	-3.15556	-3.95275
238	P19827	ITIH1	Inter-alpha-trypsin inhibitor heavy chain H1 OS=Homo sapiens GN=ITIH1 PE=1 SV=3 - [ITIH1_HUMAN]	49	39	82	38	56	29	53	87	75	41	44	45	51	41	48	-6.16667	19.75	25.9167	-0.752988	1.823	2.3922	0.466569	0.0943449	0.0347894	-4.62789	-5.26213	-4.31254
254	P29622	SERPINA4	Kallistatin OS=Homo sapiens GN=SERPINA4 PE=1 SV=3 - [KAIN_HUMAN]	9	6	6	5	7	6	8	9	13	7	9	7	10	8	9	0.166667	3.58333	3.41667	0.17639	2.86677	2.73343	0.863051	0.014702	0.0187488	-4.66541	-3.5084	-3.71925
259	P35542	SAA4	Serum amyloid A-4 protein OS=Homo sapiens GN=SAA4 PE=1 SV=2 - [SAA4_HUMAN]	NA	NA	NA	NA	1	NA	4	NA	5	2	3	4	2	3	2	-0.666667	2.83333	3.5	-1.06127	2.50192	3.27903	0.332792	0.0498546	0.0190235	-4.59245	-3.866	-2.93144
265	P36980	CFHR2	Complement factor H-related protein 2 OS=Homo sapiens GN=CFHR2 PE=1 SV=1 - [FHR2_HUMAN]	39	43	39	38	28	36	24	30	23	5	7	6	7	5	7	-3	-13	-10	-1.52665	-5.00083	-3.84679	0.15383	0.000349685	0.00249929	-4.52374	0.241276	-1.72499
308	Q14624	ITIH4	Inter-alpha-trypsin inhibitor heavy chain H4 OS=Homo sapiens GN=ITIH4 PE=1 SV=4 - [ITIH4_HUMAN]	24	19	15	14	12	8	16	23	27	27	26	32	25	31	30	-3.83333	4.75	8.58333	-1.5373	1.43998	2.60207	0.151225	0.176495	0.0238087	-4.52205	-5.80493	-3.95003
312	Q15485	FCN2	Ficolin-2 OS=Homo sapiens GN=FCN2 PE=1 SV=2 - [FCN2_HUMAN]	3	3	2	1	3	4	4	5	NA	2	2	2	1	NA	1	-0.444444	1.61111	2.05556	-0.877035	2.22049	2.89169	0.402062	0.0519574	0.0168608	-4.6122	-4.54332	-3.44346

## Sheet: Non-smokers vs. COPD
	Accession	Gene Symbol	Description.x	PSM_COPD1	PSM_COPD2	PSM_COPD3	PSM_NS1	PSM_NS2	PSM_NS3	PSM_S1	PSM_S2	PSM_S3	PSM_COPD4	PSM_COPD5	PSM_COPD6	PSM_NS4	PSM_NS5	PSM_NS6	nonSC_coef	SvsC_coef	SnonS_coef	nonSC_t	SvsC_t	SnonS_t	nonSC_P	SvsC_P	SnonS_P	nonSC_lods	SvsC_lods	SnonS_lods
102	P01771	IGHV3-33	Ig heavy chain V-III region HIL OS=Homo sapiens PE=1 SV=1 - [HV310_HUMAN]	2	2	2	4	5	3	3	4	3	1	1	1	1	2	1	1.16667	0.916667	-0.25	2.91996	1.7343	-0.47299	0.0133418	0.109517	0.645058	-4.29726	-5.39466	-6.68049
103	P01773	IGHV3-30	Ig heavy chain V-III region BUR OS=Homo sapiens PE=1 SV=1 - [HV312_HUMAN]	1	2	1	5	3	2	NA	2	3	NA	NA	NA	1	2	1	2	1.16667	-0.833333	2.6144	1.36406	-0.919064	0.0325973	0.211981	0.386599	-4.4832	-5.72757	-6.12214
122	P01877	IGHA2	Ig alpha-2 chain C region OS=Homo sapiens GN=IGHA2 PE=1 SV=3 - [IGHA2_HUMAN]	46	57	56	35	42	28	30	50	31	80	116	87	77	96	72	-15.3333	-14.6667	0.666667	-2.32975	-1.68455	0.0765705	0.0389139	0.118952	0.940279	-4.39082	-5.46732	-6.79627
177	P05090	APOD	Apolipoprotein D OS=Homo sapiens GN=APOD PE=1 SV=1 - [APOD_HUMAN]	7	6	7	10	10	7	12	11	11	7	6	7	6	7	10	1.66667	4.33333	2.66667	2.30284	4.52605	2.78526	0.0408319	0.000769316	0.017059	-4.39527	-0.558537	-3.62756
201	P08603	CFH	Complement factor H OS=Homo sapiens GN=CFH PE=1 SV=4 - [CFAH_HUMAN]	403	438	484	385	325	382	358	336	394	122	105	135	118	112	95	-45	-62.6667	-17.6667	-2.49503	-2.62652	-0.740456	0.028903	0.0227744	0.473848	-4.36376	-3.93341	-6.51198
233	P18135	IGKV3	Ig kappa chain V-III region HAH OS=Homo sapiens PE=2 SV=1 - [KV312_HUMAN]	26	27	30	23	24	26	25	21	20	4	4	7	3	3	3	-2.66667	-5.33333	-2.66667	-2.65852	-4.0193	-2.00965	0.0214879	0.00184353	0.0684866	-4.33758	-1.44193	-4.94475
307	Q14520	HABP2	Hyaluronan-binding protein 2 OS=Homo sapiens GN=HABP2 PE=1 SV=1 - [HABP2_HUMAN]	6	NA	11	3	6	4	5	4	4	6	4	7	5	5	3	-2.59259	-3.22222	-0.62963	-2.49686	-2.31302	-0.453761	0.0305587	0.0420872	0.65922	-4.39048	-4.43221	-6.62733

## Sheet: Smokers vs. COPD
	Accession	Gene Symbol	Description.x	PSM_COPD1	PSM_COPD2	PSM_COPD3	PSM_NS1	PSM_NS2	PSM_NS3	PSM_S1	PSM_S2	PSM_S3	PSM_COPD4	PSM_COPD5	PSM_COPD6	PSM_NS4	PSM_NS5	PSM_NS6	nonSC_coef	SvsC_coef	SnonS_coef	nonSC_t	SvsC_t	SnonS_t	nonSC_P	SvsC_P	SnonS_P	nonSC_lods	SvsC_lods	SnonS_lods
14	O14791	APOL1	Apolipoprotein L1 OS=Homo sapiens GN=APOL1 PE=1 SV=5 - [APOL1_HUMAN]	13	18	19	20	16	11	9	13	12	9	5	5	5	8	6	-0.5	-5.08333	-4.58333	-0.316598	-2.43315	-2.19382	0.757213	0.0323182	0.0495723	-4.66039	-4.26902	-4.64587
17	O43866	CD5L	CD5 antigen-like OS=Homo sapiens GN=CD5L PE=1 SV=1 - [CD5L_HUMAN]	44	45	62	53	40	37	26	26	25	22	18	16	15	18	16	-4.66667	-23.5	-18.8333	-1.38948	-5.28927	-4.23892	0.19096	0.000219925	0.00125743	-4.54511	0.712207	-1.03358
25	O95445	APOM	Apolipoprotein M OS=Homo sapiens GN=APOM PE=1 SV=2 - [APOM_HUMAN]	2	2	1	2	4	2	5	5	6	3	3	3	3	4	3	0.666667	3.5	2.83333	1.73538	6.88707	5.57525	0.109319	2.08e-05	0.000140484	-4.48993	3.10199	1.18491
26	P00450	CP	Ceruloplasmin OS=Homo sapiens GN=CP PE=1 SV=1 - [CERU_HUMAN]	39	24	45	19	40	30	41	59	52	55	46	55	55	56	48	-2.66667	16.5	19.1667	-0.571711	2.67407	3.10624	0.578504	0.0208886	0.00949737	-4.64431	-3.8499	-3.05419
45	P01591	JCHAIN	Immunoglobulin J chain OS=Homo sapiens GN=IGJ PE=1 SV=4 - [IGJ_HUMAN]	8	9	10	10	9	7	7	7	8	5	5	6	5	5	4	-0.5	-1.75	-1.25	-0.988007	-2.61402	-1.86716	0.343451	0.0232976	0.0875253	-4.60127	-3.95531	-5.1674
74	P01624	IGKV3-15	Ig kappa chain V-III region POM OS=Homo sapiens PE=1 SV=1 - [KV306_HUMAN]	8	6	8	6	7	3	3	4	4	NA	1	NA	1	NA	1	-1.38462	-3.35897	-1.97436	-1.59285	-3.34644	-1.87943	0.147563	0.00926429	0.0947472	-4.53654	-2.88273	-5.10479
116	P01857	IGHG1	Ig gamma-1 chain C region OS=Homo sapiens GN=IGHG1 PE=1 SV=1 - [IGHG1_HUMAN]	485	436	423	403	575	415	588	588	521	78	77	100	118	70	132	19	119	100	0.692022	3.27638	2.75326	0.502636	0.00696786	0.0180835	-4.63384	-2.7729	-3.68421
120	P01871	IGHM	Ig mu chain C region OS=Homo sapiens GN=IGHM PE=1 SV=3 - [IGHM_HUMAN]	225	274	401	254	285	216	175	136	133	203	184	143	94	199	96	-47.6667	-151.667	-104	-1.64301	-3.95182	-2.70982	0.127377	0.0020758	0.0195727	-4.50504	-1.56148	-3.76091
137	P02745	C1QA	Complement C1q subcomponent subunit A OS=Homo sapiens GN=C1QA PE=1 SV=2 - [C1QA_HUMAN]	37	36	27	19	24	30	18	20	17	5	3	4	5	3	6	-4.16667	-12.5833	-8.41667	-1.71969	-3.9259	-2.62593	0.112215	0.00217291	0.022799	-4.49251	-1.60751	-3.90831
138	P02746	C1QB	Complement C1q subcomponent subunit B OS=Homo sapiens GN=C1QB PE=1 SV=3 - [C1QB_HUMAN]	62	70	48	38	50	58	46	45	37	7	10	10	10	6	7	-6.33333	-14.8333	-8.5	-1.53386	-2.71565	-1.55616	0.152061	0.0193659	0.146705	-4.52259	-3.77659	-5.62104
139	P02747	C1QC	Complement C1q subcomponent subunit C OS=Homo sapiens GN=C1QC PE=1 SV=3 - [C1QC_HUMAN]	20	25	16	14	21	19	15	14	13	6	5	7	7	6	7	-0.833333	-5.58333	-4.75	-0.554003	-2.80587	-2.38709	0.590171	0.0164296	0.0351108	-4.6457	-3.61679	-4.32126
142	P02751	FN1	Fibronectin OS=Homo sapiens GN=FN1 PE=1 SV=4 - [FINC_HUMAN]	292	297	226	203	195	385	189	213	124	100	94	94	98	99	99	-4	-93	-89	-0.134337	-2.36103	-2.25948	0.895455	0.0367925	0.044116	-4.66637	-4.39222	-4.53673
146	P02765	AHSG	Alpha-2-HS-glycoprotein OS=Homo sapiens GN=AHSG PE=1 SV=1 - [FETUA_HUMAN]	1	2	2	3	NA	3	4	3	5	3	3	1	2	3	2	0.592593	2.03704	1.44444	1.17004	3.17967	2.22442	0.267815	0.00924473	0.0490551	-4.57856	-3.00544	-4.59216
154	P03951	F11	Coagulation factor XI OS=Homo sapiens GN=F11 PE=1 SV=1 - [FA11_HUMAN]	3	6	4	4	4	5	3	16	8	3	2	4	7	5	5	1.33333	5.33333	4	0.778213	2.35309	1.76482	0.452134	0.0373196	0.104064	-4.62531	-4.40569	-5.32195
159	P04114	APOB	Apolipoprotein B-100 OS=Homo sapiens GN=APOB PE=1 SV=2 - [APOB_HUMAN]	299	484	453	522	1040	340	856	958	852	717	488	489	480	430	461	57.1667	394.25	337.083	0.525924	2.74178	2.34422	0.608918	0.0184659	0.0379182	-4.64783	-3.73042	-4.3941
167	P04220	IGHM	Ig mu heavy chain disease protein OS=Homo sapiens PE=1 SV=1 - [MUCB_HUMAN]	164	206	303	173	217	152	126	96	90	174	152	109	61	171	70	-44	-120.5	-76.5	-1.71455	-3.54948	-2.25341	0.113179	0.00425158	0.0445955	-4.49335	-2.28089	-4.54687
175	P04434	Deleted.	Ig kappa chain V-III region VH (Fragment) OS=Homo sapiens PE=4 SV=1 - [KV310_HUMAN]	6	4	5	2	4	2	1	2	4	NA	1	3	2	2	NA	-1.4	-2.2	-0.8	-1.78123	-2.28543	-0.811249	0.106744	0.0466227	0.437039	-4.50265	-4.54755	-6.41484
177	P05090	APOD	Apolipoprotein D OS=Homo sapiens GN=APOD PE=1 SV=1 - [APOD_HUMAN]	7	6	7	10	10	7	12	11	11	7	6	7	6	7	10	1.66667	4.33333	2.66667	2.30284	4.52605	2.78526	0.0408319	0.000769316	0.017059	-4.39527	-0.558537	-3.62756
190	P06396	GSN	Gelsolin OS=Homo sapiens GN=GSN PE=1 SV=1 - [GELS_HUMAN]	7	1	9	6	8	11	10	6	15	15	12	14	17	17	20	3.5	5.08333	1.58333	2.04871	2.24927	0.700593	0.0639835	0.0449249	0.497466	-4.43768	-4.58059	-6.54147
199	P08519	LPA	Apolipoprotein(a) OS=Homo sapiens GN=LPA PE=1 SV=1 - [APOA_HUMAN]	30	59	21	7	18	50	94	77	91	9	19	3	8	7	7	-7.33333	52.8333	60.1667	-0.932041	5.07601	5.78057	0.370441	0.000309523	0.000102558	-4.6081	0.365151	1.5035
200	P08571	CD14	Monocyte differentiation antigen CD14 OS=Homo sapiens GN=CD14 PE=1 SV=2 - [CD14_HUMAN]	1	1	NA	NA	3	NA	5	NA	4	NA	NA	NA	NA	NA	2	2	3.5	1.5	3.34674	7.17308	2.4502	0.0570524	0.00975359	0.107968	-4.56333	-1.76242	-4.29889
201	P08603	CFH	Complement factor H OS=Homo sapiens GN=CFH PE=1 SV=4 - [CFAH_HUMAN]	403	438	484	385	325	382	358	336	394	122	105	135	118	112	95	-45	-62.6667	-17.6667	-2.49503	-2.62652	-0.740456	0.028903	0.0227744	0.473848	-4.36376	-3.93341	-6.51198
204	P09871	C1S	Complement C1s subcomponent OS=Homo sapiens GN=C1S PE=1 SV=1 - [C1S_HUMAN]	40	38	38	40	38	36	42	41	43	20	17	20	19	18	21	-0.166667	3.58333	3.75	-0.199225	3.2379	3.3885	0.84556	0.00747268	0.00568556	-4.66478	-2.84226	-2.5463
215	P10909	CLU	Clusterin OS=Homo sapiens GN=CLU PE=1 SV=1 - [CLUS_HUMAN]	16	13	13	13	15	12	15	17	16	11	10	12	11	11	11	-0.333333	2.16667	2.5	-0.504251	2.47766	2.85883	0.623592	0.0298249	0.0149165	-4.6494	-4.19241	-3.49688
219	P11597	CETP	Cholesteryl ester transfer protein OS=Homo sapiens GN=CETP PE=1 SV=2 - [CETP_HUMAN]	1	3	NA	NA	3	1	8	3	9	1	1	NA	2	NA	3	0.75	5.04167	4.29167	0.566106	3.19725	2.63015	0.587815	0.0137461	0.0318328	-4.6282	-3.15556	-3.95275
233	P18135	IGKV3-20	Ig kappa chain V-III region HAH OS=Homo sapiens PE=2 SV=1 - [KV312_HUMAN]	26	27	30	23	24	26	25	21	20	4	4	7	3	3	3	-2.66667	-5.33333	-2.66667	-2.65852	-4.0193	-2.00965	0.0214879	0.00184353	0.0684866	-4.33758	-1.44193	-4.94475
235	P18428	LBP	Lipopolysaccharide-binding protein OS=Homo sapiens GN=LBP PE=1 SV=3 - [LBP_HUMAN]	7	6	5	7	12	5	13	7	12	4	6	1	3	3	4	0.833333	4.08333	3.25	0.602137	2.23035	1.77517	0.55875	0.0464623	0.102271	-4.64183	-4.61215	-5.30654
251	P27169	PON1	Serum paraoxonase/arylesterase 1 OS=Homo sapiens GN=PON1 PE=1 SV=3 - [PON1_HUMAN]	18	26	28	22	24	18	35	21	36	11	8	9	14	13	13	0.666667	8.33333	7.66667	0.245842	2.32299	2.13715	0.810131	0.0393874	0.0547916	-4.66327	-4.4567	-4.73904
254	P29622	SERPINA4	Kallistatin OS=Homo sapiens GN=SERPINA4 PE=1 SV=3 - [KAIN_HUMAN]	9	6	6	5	7	6	8	9	13	7	9	7	10	8	9	0.166667	3.58333	3.41667	0.17639	2.86677	2.73343	0.863051	0.014702	0.0187488	-4.66541	-3.5084	-3.71925
259	P35542	SAA4	Serum amyloid A-4 protein OS=Homo sapiens GN=SAA4 PE=1 SV=2 - [SAA4_HUMAN]	NA	NA	NA	NA	1	NA	4	NA	5	2	3	4	2	3	2	-0.666667	2.83333	3.5	-1.06127	2.50192	3.27903	0.332792	0.0498546	0.0190235	-4.59245	-3.866	-2.93144
261	P35858	IGFALS	Insulin-like growth factor-binding protein complex acid labile subunit OS=Homo sapiens GN=IGFALS PE=1 SV=1 - [ALS_HUMAN]	7	5	5	5	6	5	10	10	8	8	3	13	12	11	11	1.5	4.58333	3.08333	1.07843	2.49093	1.67572	0.30291	0.0291179	0.1207	-4.58965	-4.16947	-5.45245
265	P36980	CFHR2	Complement factor H-related protein 2 OS=Homo sapiens GN=CFHR2 PE=1 SV=1 - [FHR2_HUMAN]	39	43	39	38	28	36	24	30	23	5	7	6	7	5	7	-3	-13	-10	-1.52665	-5.00083	-3.84679	0.15383	0.000349685	0.00249929	-4.52374	0.241276	-1.72499
284	P80108	GPLD1	Phosphatidylinositol-glycan-specific phospholipase D OS=Homo sapiens GN=GPLD1 PE=1 SV=3 - [PHLD_HUMAN]	1	1	2	4	3	NA	3	NA	11	7	2	9	7	6	9	1.7037	5.48148	3.77778	1.07627	2.4185	1.70132	0.308331	0.0373119	0.121257	-4.59009	-4.22667	-5.31747
307	Q14520	HABP2	Hyaluronan-binding protein 2 OS=Homo sapiens GN=HABP2 PE=1 SV=1 - [HABP2_HUMAN]	6	NA	11	3	6	4	5	4	4	6	4	7	5	5	3	-2.59259	-3.22222	-0.62963	-2.49686	-2.31302	-0.453761	0.0305587	0.0420872	0.65922	-4.39048	-4.43221	-6.62733
