# Supplementary material
Source: publisher figshare collection journal article supplement (https://acs.figshare.com/ndownloader/files/15544481)
Supplement: Supplementary file 3 [file 15544481 › Revised Support Information ACS Omega/Table S8..xlsx]

## Sheet: EV markers based on peptides
				Batch 1 (ExoQuick)												Batch 2 (ExoSpin)
				Non-smokers			Smokers			COPD			Average No. of Identified peptides			Non-smoker			COPD			Average No. of Identified peptides
Sl.No.	Accession	Gene Symbol	Description.x	pep_NS1	pep_NS2	pep_NS3	pep_S1	pep_S2	pep_S3	pep_COPD1	pep_COPD2	pep_COPD3	Non-smokers	Smokers	COPD	pep_NS4	pep_NS5	pep_NS6	pep_COPD4	pep_COPD5	pep_COPD6	Non-smokers	COPD
1	P01023	A2M	Alpha-2-macroglobulin OS=Homo sapiens GN=A2M PE=1 SV=3 - [A2MG_HUMAN]	54	65	43	54	58	67	71	52	66	54	59.6667	63	79	76	78	77	80	76	77.6667	77.6667
2	P01024	C3	Complement C3 OS=Homo sapiens GN=C3 PE=1 SV=2 - [CO3_HUMAN]	153	160	152	159	174	151	157	154	157	155	161.333	156	122	119	118	111	122	126	119.667	119.667
3	P02649	APOE	Apolipoprotein E OS=Homo sapiens GN=APOE PE=1 SV=1 - [APOE_HUMAN]	26	25	22	25	24	25	26	26	23	24.3333	24.6667	25	21	17	21	20	21	18	19.6667	19.6667
4	P02751	FN1	Fibronectin OS=Homo sapiens GN=FN1 PE=1 SV=4 - [FINC_HUMAN]	86	84	107	88	86	72	97	97	86	92.3333	82	93.3333	60	60	60	62	57	58	60	59
5	P02768	ALB	Serum albumin OS=Homo sapiens GN=ALB PE=1 SV=2 - [ALBU_HUMAN]	47	49	47	48	45	49	54	51	48	47.6667	47.3333	51	54	57	58	58	54	58	56.3333	56.6667
6	P06396	GSN	Gelsolin OS=Homo sapiens GN=GSN PE=1 SV=1 - [GELS_HUMAN]	6	7	11	10	6	13	7	1	8	8	9.66667	5.33333	13	15	18	14	11	12	15.3333	12.3333
7	P07996	THBS1	Thrombospondin-1 OS=Homo sapiens GN=THBS1 PE=1 SV=2 - [TSP1_HUMAN]	10	7	9	4	23	15	14	29	41	8.66667	14	28	1	NA	2	NA	3	NA	1.5	3
8	P10909	CLU	Clusterin OS=Homo sapiens GN=CLU PE=1 SV=1 - [CLUS_HUMAN]	10	10	10	11	12	10	10	11	8	10	11	9.66667	8	9	9	9	7	10	8.66667	8.66667
9	P11021	HSPA5	78 kDa glucose-regulated protein OS=Homo sapiens GN=HSPA5 PE=1 SV=2 - [GRP78_HUMAN]	2	1	1	NA	1	2	1	2	5	1.33333	1.5	2.66667	4	1	NA	1	1	1	2.5	1
10	P12814	ACTN1	Alpha-actinin-1 OS=Homo sapiens GN=ACTN1 PE=1 SV=2 - [ACTN1_HUMAN]	8	4	7	5	3	11	NA	10	11	6.33333	6.33333	10.5	3	NA	NA	NA	1	NA	3	1
11	P13645	KRT10	Keratin, type I cytoskeletal 10 OS=Homo sapiens GN=KRT10 PE=1 SV=6 - [K1C10_HUMAN]	15	19	14	15	18	20	23	12	18	16	17.6667	17.6667	30	17	19	13	9	16	22	12.6667
12	P35527	KRT9	Keratin, type I cytoskeletal 9 OS=Homo sapiens GN=KRT9 PE=1 SV=3 - [K1C9_HUMAN]	14	13	7	13	17	23	17	15	14	11.3333	17.6667	15.3333	14	9	12	16	3	12	11.6667	10.3333
13	P35908	KRT2	Keratin, type II cytoskeletal 2 epidermal OS=Homo sapiens GN=KRT2 PE=1 SV=2 - [K22E_HUMAN]	16	17	10	14	17	23	28	14	23	14.3333	18	21.6667	36	20	18	21	9	22	24.6667	17.3333
14	Q08380	LGALS3BP	Galectin-3-binding protein OS=Homo sapiens GN=LGALS3BP PE=1 SV=1 - [LG3BP_HUMAN]	19	17	19	22	19	20	18	19	20	18.3333	20.3333	19	10	10	10	7	9	13	10	9.66667
15	Q9Y490	TLN1	Talin-1 OS=Homo sapiens GN=TLN1 PE=1 SV=3 - [TLN1_HUMAN]	9	2	12	NA	3	4	NA	6	1	7.66667	3.5	3.5	4	NA	3	1	NA	NA	3.5	1
16	P02786	TFRC	Transferrin receptor protein 1 OS=Homo sapiens GN=TFRC PE=1 SV=2 - [TFR1_HUMAN]	NA	1	NA	NA	NA	1	1	1	NA	1	1	1	NA	6	4	NA	1	5	5	3
17	P60709	ACTB	Actin, cytoplasmic 1 OS=Homo sapiens GN=ACTB PE=1 SV=1 - [ACTB_HUMAN]	NA	NA	NA	NA	2	2	NA	NA	3	NA	2	3	8	6	6	6	8	4	6.66667	6
18	P69905	HBA1	Hemoglobin subunit alpha OS=Homo sapiens GN=HBA1 PE=1 SV=2 - [HBA_HUMAN]	NA	NA	NA	2	NA	NA	NA	NA	NA	NA	2	NA	9	5	9	9	8	8	7.66667	8.33333
19	P13646	KRT13	Keratin, type I cytoskeletal 13 OS=Homo sapiens GN=KRT13 PE=1 SV=4 - [K1C13_HUMAN]	NA	NA	NA	NA	NA	NA	NA	NA	NA	NA	NA	NA	7	2	1	2	NA	NA	3.33333	2
20	P07737	PFN1	Profilin-1 OS=Homo sapiens GN=PFN1 PE=1 SV=2 - [PROF1_HUMAN]	NA	NA	NA	NA	NA	NA	NA	NA	NA	NA	NA	NA	1	1	1	NA	NA	NA	1	NA
21	P35579	MYH9	Myosin-9 OS=Homo sapiens GN=MYH9 PE=1 SV=4 - [MYH9_HUMAN]	NA	NA	NA	NA	NA	NA	NA	NA	NA	NA	NA	NA	4	1	1	NA	NA	NA	2	NA
22	Q9BQE3	TBA1C	Tubulin alpha-1C chain OS=Homo sapiens GN=TUBA1C PE=1 SV=1 - [TBA1C_HUMAN]	NA	NA	NA	NA	NA	NA	NA	NA	NA	NA	NA	NA	1	2	NA	NA	NA	NA	1.5	NA
23	P06733	ENO1	Alpha-enolase OS=Homo sapiens GN=ENO1 PE=1 SV=2 - [ENOA_HUMAN]	NA	NA	NA	NA	NA	NA	NA	NA	NA	NA	NA	NA	1	NA	NA	NA	NA	NA	1	NA
24	P07195	LDHB	L-lactate dehydrogenase B chain OS=Homo sapiens GN=LDHB PE=1 SV=2 - [LDHB_HUMAN]	NA	NA	NA	NA	NA	NA	NA	NA	NA	NA	NA	NA	1	NA	1	NA	NA	NA	1	NA
25	P07355	ANXA2	Annexin A2 OS=Homo sapiens GN=ANXA2 PE=1 SV=2 - [ANXA2_HUMAN]	NA	NA	NA	NA	NA	NA	NA	NA	NA	NA	NA	NA	2	NA	NA	NA	NA	NA	2	NA
26	P07900	HSP90AA1	Heat shock protein HSP 90-alpha OS=Homo sapiens GN=HSP90AA1 PE=1 SV=5 - [HS90A_HUMAN]	NA	NA	NA	NA	NA	NA	NA	NA	NA	NA	NA	NA	2	NA	NA	NA	NA	NA	2	NA
27	P08133	ANXA6	Annexin A6 OS=Homo sapiens GN=ANXA6 PE=1 SV=3 - [ANXA6_HUMAN]	NA	NA	NA	NA	NA	NA	NA	NA	NA	NA	NA	NA	2	NA	NA	NA	NA	NA	2	NA
28	P09211	GSTP1	Glutathione S-transferase P OS=Homo sapiens GN=GSTP1 PE=1 SV=2 - [GSTP1_HUMAN]	NA	NA	NA	NA	NA	NA	NA	NA	NA	NA	NA	NA	1	NA	NA	NA	NA	NA	1	NA
29	P14618	PKM	Pyruvate kinase isozymes M1/M2 OS=Homo sapiens GN=PKM PE=1 SV=4 - [KPYM_HUMAN]	NA	NA	NA	NA	NA	NA	NA	NA	NA	NA	NA	NA	2	NA	NA	NA	NA	NA	2	NA
30	P21333	FLNA	Filamin-A OS=Homo sapiens GN=FLNA PE=1 SV=4 - [FLNA_HUMAN]	NA	NA	NA	NA	NA	NA	NA	NA	NA	NA	NA	NA	7	NA	NA	NA	NA	NA	7	NA
31	P30041	PRDX6	Peroxiredoxin-6 OS=Homo sapiens GN=PRDX6 PE=1 SV=3 - [PRDX6_HUMAN]	NA	NA	NA	NA	NA	NA	NA	NA	NA	NA	NA	NA	1	NA	NA	NA	NA	NA	1	NA
32	P49368	CCT3	T-complex protein 1 subunit gamma OS=Homo sapiens GN=CCT3 PE=1 SV=4 - [TCPG_HUMAN]	NA	NA	NA	NA	NA	NA	NA	NA	NA	NA	NA	NA	1	NA	NA	NA	NA	NA	1	NA
33	P62258	YWHAE	14-3-3 protein epsilon OS=Homo sapiens GN=YWHAE PE=1 SV=1 - [1433E_HUMAN]	NA	NA	NA	NA	NA	NA	NA	NA	NA	NA	NA	NA	1	NA	NA	NA	NA	NA	1	NA
34	P62805	HISTH4A	Histone H4 OS=Homo sapiens GN=HIST1H4A PE=1 SV=2 - [H4_HUMAN]	NA	NA	NA	NA	NA	NA	NA	NA	NA	NA	NA	NA	1	NA	1	NA	NA	NA	1	NA
35	P62937	PPIA	Peptidyl-prolyl cis-trans isomerase A OS=Homo sapiens GN=PPIA PE=1 SV=2 - [PPIA_HUMAN]	NA	NA	NA	NA	NA	NA	NA	NA	NA	NA	NA	NA	1	NA	NA	NA	NA	NA	1	NA
36	P04406	GAPDH	Glyceraldehyde-3-phosphate dehydrogenase OS=Homo sapiens GN=GAPDH PE=1 SV=3 - [G3P_HUMAN]	NA	NA	NA	NA	NA	1	NA	NA	NA	NA	1		NA	NA	NA	NA	NA	NA	NA	NA
37	P04083	ANXA1	Annexin A1 OS=Homo sapiens GN=ANXA1 PE=1 SV=2 - [ANXA1_HUMAN]	NA	NA	NA	NA	NA	NA	NA	NA	NA	NA	NA	NA	1	NA	NA	NA	NA	NA	1	NA

## Sheet: EV markers based on PSMs
				Batch 1 (ExoQuick)												Batch 2 (ExoSpin)
				Non-smokers			Smokers			COPD			Average No. of Identified peptides			Non-smokers			COPD			Average No. of Identified peptides
Sl.No.	Accession	Gene Symbol	Description.x	PSM_NS1	PSM_NS2	PSM_NS3	PSM_S1	PSM_S2	PSM_S3	PSM_COPD1	PSM_COPD2	PSM_COPD3	Non-smokers	Smokers	COPD	PSM_NS4	PSM_NS5	PSM_NS6	PSM_COPD4	PSM_COPD5	PSM_COPD6	Non-smokers	COPD
1	P01023	A2M	Alpha-2-macroglobulin OS=Homo sapiens GN=A2M PE=1 SV=3 - [A2MG_HUMAN]	80	125	62	84	111	174	172	79	141	89	123	130.667	476	460	430	613	556	389	455.333	519.333
2	P01024	C3	Complement C3 OS=Homo sapiens GN=C3 PE=1 SV=2 - [CO3_HUMAN]	898	1228	883	911	1450	951	960	854	1156	1003	1104	990	516	544	500	476	558	622	520	552
3	P02649	APOE	Apolipoprotein E OS=Homo sapiens GN=APOE PE=1 SV=1 - [APOE_HUMAN]	40	38	33	39	38	37	44	37	33	37	38	38	33	24	29	28	29	26	28.6667	27.6667
4	P02751	FN1	Fibronectin OS=Homo sapiens GN=FN1 PE=1 SV=4 - [FINC_HUMAN]	203	195	385	189	213	124	292	297	226	261	175.333	271.667	98	99	99	100	94	94	98.6667	96
5	P02768	ALB	Serum albumin OS=Homo sapiens GN=ALB PE=1 SV=2 - [ALBU_HUMAN]	111	100	113	107	91	107	170	110	109	108	101.667	129.667	314	410	377	381	332	386	367	366.333
6	P06396	GSN	Gelsolin OS=Homo sapiens GN=GSN PE=1 SV=1 - [GELS_HUMAN]	6	8	11	10	6	15	7	1	9	8.33333	10.3333	5.66667	17	17	20	15	12	14	18	13.6667
7	P07996	THBS1	Thrombospondin-1 OS=Homo sapiens GN=THBS1 PE=1 SV=2 - [TSP1_HUMAN]	10	7	9	4	25	16	14	36	73	8.66667	15	41	1	NA	2	NA	3	NA	1.5	3
8	P10909	CLU	Clusterin OS=Homo sapiens GN=CLU PE=1 SV=1 - [CLUS_HUMAN]	13	15	12	15	17	16	16	13	13	13.3333	16	14	11	11	11	11	10	12	11	11
9	P11021	HSPA5	78 kDa glucose-regulated protein OS=Homo sapiens GN=HSPA5 PE=1 SV=2 - [GRP78_HUMAN]	2	1	1	NA	1	2	1	2	5	1.33333	1.5	2.66667	5	1	NA	1	1	1	3	1
10	P12814	ACTN1	Alpha-actinin-1 OS=Homo sapiens GN=ACTN1 PE=1 SV=2 - [ACTN1_HUMAN]	8	4	7	5	3	11	NA	10	11	6.33333	6.33333	10.5	3	NA	NA	NA	1	NA	3	1
11	P13645	KRT10	Keratin, type I cytoskeletal 10 OS=Homo sapiens GN=KRT10 PE=1 SV=6 - [K1C10_HUMAN]	17	22	16	18	21	28	28	14	20	18.3333	22.3333	20.6667	51	20	21	15	10	18	30.6667	14.3333
12	P35527	KRT9	Keratin, type I cytoskeletal 9 OS=Homo sapiens GN=KRT9 PE=1 SV=3 - [K1C9_HUMAN]	14	16	8	15	21	28	21	21	15	12.6667	21.3333	19	15	9	12	17	3	12	12	10.6667
13	P35908	KRT2	Keratin, type II cytoskeletal 2 epidermal OS=Homo sapiens GN=KRT2 PE=1 SV=2 - [K22E_HUMAN]	16	17	10	15	19	25	37	16	28	14.3333	19.6667	27	68	22	20	21	9	23	36.6667	17.6667
14	Q08380	LGALS3BP	Galectin-3-binding protein OS=Homo sapiens GN=LGALS3BP PE=1 SV=1 - [LG3BP_HUMAN]	28	26	26	32	27	24	29	29	32	26.6667	27.6667	30	12	13	11	8	10	16	12	11.3333
15	Q9Y490	TLN1	Talin-1 OS=Homo sapiens GN=TLN1 PE=1 SV=3 - [TLN1_HUMAN]	9	2	12	NA	3	4	NA	6	1	7.66667	3.5	3.5	4	NA	3	1	NA	NA	3.5	1
16	P02786	TFRC	Transferrin receptor protein 1 OS=Homo sapiens GN=TFRC PE=1 SV=2 - [TFR1_HUMAN]	NA	1	NA	NA	NA	1	1	1	NA	1	1	1	NA	6	4	NA	1	5	5	3
17	P60709	ACTB	Actin, cytoplasmic 1 OS=Homo sapiens GN=ACTB PE=1 SV=1 - [ACTB_HUMAN]	NA	NA	NA	NA	2	2	NA	NA	3	NA	2	3	11	7	6	6	9	4	8	6.33333
18	P69905	HBA1	Hemoglobin subunit alpha OS=Homo sapiens GN=HBA1 PE=1 SV=2 - [HBA_HUMAN]	NA	NA	NA	2	NA	NA	NA	NA	NA	NA	2	NA	13	6	11	13	12	9	10	11.3333
19	P13646	KRT13	Keratin, type I cytoskeletal 13 OS=Homo sapiens GN=KRT13 PE=1 SV=4 - [K1C13_HUMAN]	NA	NA	NA	NA	NA	NA	NA	NA	NA	NA	NA	NA	7	2	1	2	NA	NA	3.33333	2
20	P07737	PFN1	Profilin-1 OS=Homo sapiens GN=PFN1 PE=1 SV=2 - [PROF1_HUMAN]	NA	NA	NA	NA	NA	NA	NA	NA	NA	NA	NA	NA	3	2	1	NA	NA	NA	2	NA
21	P35579	MYH9	Myosin-9 OS=Homo sapiens GN=MYH9 PE=1 SV=4 - [MYH9_HUMAN]	NA	NA	NA	NA	NA	NA	NA	NA	NA	NA	NA	NA	4	1	1	NA	NA	NA	2	NA
22	Q9BQE3	TBA1C	Tubulin alpha-1C chain OS=Homo sapiens GN=TUBA1C PE=1 SV=1 - [TBA1C_HUMAN]	NA	NA	NA	NA	NA	NA	NA	NA	NA	NA	NA	NA	2	3	NA	NA	NA	NA	2.5	NA
23	P06733	ENO1	Alpha-enolase OS=Homo sapiens GN=ENO1 PE=1 SV=2 - [ENOA_HUMAN]	NA	NA	NA	NA	NA	NA	NA	NA	NA	NA	NA	NA	1	NA	NA	NA	NA	NA	1	NA
24	P07195	LDHB	L-lactate dehydrogenase B chain OS=Homo sapiens GN=LDHB PE=1 SV=2 - [LDHB_HUMAN]	NA	NA	NA	NA	NA	NA	NA	NA	NA	NA	NA	NA	1	NA	1	NA	NA	NA	1	NA
25	P07355	ANXA2	Annexin A2 OS=Homo sapiens GN=ANXA2 PE=1 SV=2 - [ANXA2_HUMAN]	NA	NA	NA	NA	NA	NA	NA	NA	NA	NA	NA	NA	2	NA	NA	NA	NA	NA	2	NA
26	P07900	HSP90AA1	Heat shock protein HSP 90-alpha OS=Homo sapiens GN=HSP90AA1 PE=1 SV=5 - [HS90A_HUMAN]	NA	NA	NA	NA	NA	NA	NA	NA	NA	NA	NA	NA	2	NA	NA	NA	NA	NA	2	NA
27	P08133	ANXA6	Annexin A6 OS=Homo sapiens GN=ANXA6 PE=1 SV=3 - [ANXA6_HUMAN]	NA	NA	NA	NA	NA	NA	NA	NA	NA	NA	NA	NA	2	NA	NA	NA	NA	NA	2	NA
28	P09211	GSTP1	Glutathione S-transferase P OS=Homo sapiens GN=GSTP1 PE=1 SV=2 - [GSTP1_HUMAN]	NA	NA	NA	NA	NA	NA	NA	NA	NA	NA	NA	NA	1	NA	NA	NA	NA	NA	1	NA
29	P14618	PKM	Pyruvate kinase isozymes M1/M2 OS=Homo sapiens GN=PKM PE=1 SV=4 - [KPYM_HUMAN]	NA	NA	NA	NA	NA	NA	NA	NA	NA	NA	NA	NA	2	NA	NA	NA	NA	NA	2	NA
30	P21333	FLNA	Filamin-A OS=Homo sapiens GN=FLNA PE=1 SV=4 - [FLNA_HUMAN]	NA	NA	NA	NA	NA	NA	NA	NA	NA	NA	NA	NA	7	NA	NA	NA	NA	NA	7	NA
31	P30041	PRDX6	Peroxiredoxin-6 OS=Homo sapiens GN=PRDX6 PE=1 SV=3 - [PRDX6_HUMAN]	NA	NA	NA	NA	NA	NA	NA	NA	NA	NA	NA	NA	1	NA	NA	NA	NA	NA	1	NA
32	P49368	CCT3	T-complex protein 1 subunit gamma OS=Homo sapiens GN=CCT3 PE=1 SV=4 - [TCPG_HUMAN]	NA	NA	NA	NA	NA	NA	NA	NA	NA	NA	NA	NA	1	NA	NA	NA	NA	NA	1	NA
33	P62258	YWHAE	14-3-3 protein epsilon OS=Homo sapiens GN=YWHAE PE=1 SV=1 - [1433E_HUMAN]	NA	NA	NA	NA	NA	NA	NA	NA	NA	NA	NA	NA	1	NA	NA	NA	NA	NA	1	NA
34	P62805	HISTH4A	Histone H4 OS=Homo sapiens GN=HIST1H4A PE=1 SV=2 - [H4_HUMAN]	NA	NA	NA	NA	NA	NA	NA	NA	NA	NA	NA	NA	1	NA	1	NA	NA	NA	1	NA
35	P62937	PPIA	Peptidyl-prolyl cis-trans isomerase A OS=Homo sapiens GN=PPIA PE=1 SV=2 - [PPIA_HUMAN]	NA	NA	NA	NA	NA	NA	NA	NA	NA	NA	NA	NA	1	NA	NA	NA	NA	NA	1	NA
36	P04406	GAPDH	Glyceraldehyde-3-phosphate dehydrogenase OS=Homo sapiens GN=GAPDH PE=1 SV=3 - [G3P_HUMAN]	NA	NA	NA	NA	NA	1	NA	NA	NA	NA	1		NA	NA	NA	NA	NA	NA	NA	NA
37	P04083	ANXA1	Annexin A1 OS=Homo sapiens GN=ANXA1 PE=1 SV=2 - [ANXA1_HUMAN]	NA	NA	NA	NA	NA	NA	NA	NA	NA	NA	NA	NA	1	NA	NA	NA	NA	NA	1	NA
