# Supplementary material
Source: publisher figshare collection journal article supplement (https://acs.figshare.com/ndownloader/files/15544481)
Supplement: Supplementary file 3 [file 15544481 › Revised Support Information ACS Omega/Table S9..xlsx]

## Sheet: EV markers based on Peptides
				Batch 1 (ExoQuick)												Batch 2 (ExoSpin)
				Non-smokers			Smokers			COPD			Average No. of identified peptides			Non-smokers			COPD			Average No. of identified peptides
	Accession	Gene Symbol	Description.x	pep_NS1	pep_NS2	pep_NS3	pep_S1	pep_S2	pep_S3	pep_COPD1	pep_COPD2	pep_COPD3	Non-smokers	Smokers	COPD	pep_NS4	pep_NS5	pep_NS6	pep_COPD4	pep_COPD5	pep_COPD6	Non-smokers	COPD
445	P63267	ACTG2	Actin, gamma-enteric smooth muscle OS=Homo sapiens GN=ACTG2 PE=1 SV=1 - [ACTH_HUMAN]	NA	NA	NA	NA	NA	NA	NA	NA	NA	NA	NA	NA	6	6	5	4	8	4	5.66667	5.33333
267	P43652	AFAM	Afamin OS=Homo sapiens GN=AFM PE=1 SV=1 - [AFAM_HUMAN]	NA	NA	NA	NA	NA	NA	4	1	1	NA	NA	2	4	6	5	5	4	3	5	4
145	P02763	ORM1	Alpha-1-acid glycoprotein 1 OS=Homo sapiens GN=ORM1 PE=1 SV=1 - [A1AG1_HUMAN]	NA	1	1	1	1	1	2	1	1	1	1	1.33333	NA	NA	NA	1	NA	1	NA	1
236	P19652	ORM2	Alpha-1-acid glycoprotein 2 OS=Homo sapiens GN=ORM2 PE=1 SV=2 - [A1AG2_HUMAN]	1	2	1	4	1	2	2	3	4	1.33333	2.33333	3	NA	NA	NA	NA	NA	2	NA	2
39	P01011	AACT	Alpha-1-antichymotrypsin OS=Homo sapiens GN=SERPINA3 PE=1 SV=2 - [AACT_HUMAN]	14	14	13	7	8	17	11	12	10	13.6667	10.6667	11	9	12	9	9	9	11	10	9.66667
38	P01009	A1AT	Alpha-1-antitrypsin OS=Homo sapiens GN=SERPINA1 PE=1 SV=3 - [A1AT_HUMAN]	18	18	20	20	16	28	27	24	22	18.6667	21.3333	24.3333	13	22	17	19	13	17	17.3333	16.3333
202	P08697	A2AP	Alpha-2-antiplasmin OS=Homo sapiens GN=SERPINF2 PE=1 SV=3 - [A2AP_HUMAN]	6	8	3	12	4	10	4	10	6	5.66667	8.66667	6.66667	11	10	10	7	9	10	10.3333	8.66667
166	P04217	A1BG	Alpha-1B-glycoprotein OS=Homo sapiens GN=A1BG PE=1 SV=4 - [A1BG_HUMAN]	4	1	3	3	3	4	6	3	4	2.66667	3.33333	4.33333	7	8	3	5	7	6	6	6
146	P02765	FETUA	Alpha-2-HS-glycoprotein OS=Homo sapiens GN=AHSG PE=1 SV=1 - [FETUA_HUMAN]	3	NA	3	4	3	4	1	2	2	3	3.66667	1.66667	2	3	2	3	3	1	2.33333	2.33333
426	P15144	ANPEP	Aminopeptidase N OS=Homo sapiens GN=ANPEP PE=1 SV=4 - [AMPN_HUMAN]	NA	NA	NA	NA	NA	NA	NA	NA	NA	NA	NA	NA	1	NA	NA	NA	NA	NA	1	NA
40	P01019	ANGT	Angiotensinogen OS=Homo sapiens GN=AGT PE=1 SV=1 - [ANGT_HUMAN]	3	5	2	1	3	2	11	5	3	3.33333	2	6.33333	6	6	3	6	5	5	5	5.33333
37	P01008	ANT3	Antithrombin-III OS=Homo sapiens GN=SERPINC1 PE=1 SV=1 - [ANT3_HUMAN]	6	6	6	8	7	11	11	9	7	6	8.66667	9	17	15	17	16	14	17	16.3333	15.6667
199	P08519	APOA	Apolipoprotein(a) OS=Homo sapiens GN=LPA PE=1 SV=1 - [APOA_HUMAN]	7	12	30	41	38	45	23	36	14	16.3333	41.3333	24.3333	7	6	6	8	17	3	6.33333	9.33333
127	P02647	APOA1	Apolipoprotein A-I OS=Homo sapiens GN=APOA1 PE=1 SV=1 - [APOA1_HUMAN]	24	26	22	26	20	26	26	28	27	24	24	27	19	23	24	21	20	22	22	21
129	P02652	APOA2	Apolipoprotein A-II OS=Homo sapiens GN=APOA2 PE=1 SV=1 - [APOA2_HUMAN]	NA	NA	NA	NA	NA	2	NA	NA	NA	NA	2	NA	2	4	3	3	NA	4	3	3.5
191	P06727	APOA4	Apolipoprotein A-IV OS=Homo sapiens GN=APOA4 PE=1 SV=3 - [APOA4_HUMAN]	12	12	11	11	6	15	11	10	4	11.6667	10.6667	8.33333	15	17	20	14	16	20	17.3333	16.6667
159	P04114	APOB	Apolipoprotein B-100 OS=Homo sapiens GN=APOB PE=1 SV=2 - [APOB_HUMAN]	251	318	205	300	318	288	203	249	239	258	302	230.333	251	236	242	263	238	239	243	246.667
177	P05090	APOD	Apolipoprotein D OS=Homo sapiens GN=APOD PE=1 SV=1 - [APOD_HUMAN]	6	6	5	7	7	7	5	5	6	5.66667	7	5.33333	4	5	6	4	5	5	5	4.66667
14	O14791	APOL1	Apolipoprotein L1 OS=Homo sapiens GN=APOL1 PE=1 SV=5 - [APOL1_HUMAN]	11	12	10	9	11	10	11	11	13	11	10	11.6667	5	8	6	8	5	4	6.33333	5.66667
244	P22792	CPN2	Carboxypeptidase N subunit 2 OS=Homo sapiens GN=CPN2 PE=1 SV=3 - [CPN2_HUMAN]	NA	2	NA	2	1	2	2	2	1	2	1.66667	1.66667	2	4	4	5	3	4	3.33333	4
158	P04040	CATA	Catalase OS=Homo sapiens GN=CAT PE=1 SV=3 - [CATA_HUMAN]	NA	NA	NA	NA	NA	NA	NA	3	NA	NA	NA	3	4	NA	NA	NA	NA	NA	4	NA
156	P04003	C4BPA	C4b-binding protein alpha chain OS=Homo sapiens GN=C4BPA PE=1 SV=2 - [C4BPA_HUMAN]	41	43	38	39	43	40	41	43	44	40.6667	40.6667	42.6667	29	27	27	29	30	30	27.6667	29.6667
240	P20851	C4BPB	C4b-binding protein beta chain OS=Homo sapiens GN=C4BPB PE=1 SV=1 - [C4BPB_HUMAN]	8	8	9	9	10	10	9	10	9	8.33333	9.66667	9.33333	5	5	4	4	6	4	4.66667	4.66667
17	O43866	CD5L	CD5 antigen-like OS=Homo sapiens GN=CD5L PE=1 SV=1 - [CD5L_HUMAN]	22	17	17	15	17	17	18	19	19	18.6667	16.3333	18.6667	12	14	13	14	13	13	13	13.3333
26	P00450	CERU	Ceruloplasmin OS=Homo sapiens GN=CP PE=1 SV=1 - [CERU_HUMAN]	15	28	22	31	37	35	27	21	35	21.6667	34.3333	27.6667	35	39	36	38	36	35	36.6667	36.3333
403	P06276	CHLE	Cholinesterase OS=Homo sapiens GN=BCHE PE=1 SV=1 - [CHLE_HUMAN]	NA	NA	NA	NA	NA	NA	NA	NA	NA	NA	NA	NA	NA	NA	2	1	NA	4	2	2.5
28	P00488	F13A1	Coagulation factor XIII A chain OS=Homo sapiens GN=F13A1 PE=1 SV=4 - [F13A_HUMAN]	4	6	NA	1	4	NA	15	9	7	5	2.5	10.3333	12	11	10	14	10	10	11	11.3333
353	Q9BWP8	COL11	Collectin-11 OS=Homo sapiens GN=COLEC11 PE=1 SV=1 - [COL11_HUMAN]	NA	NA	1	NA	1	NA	NA	4	NA	1	1	4	NA	NA	NA	NA	NA	NA	NA	NA
138	P02746	C1QB	Complement C1q subcomponent subunit B OS=Homo sapiens GN=C1QB PE=1 SV=3 - [C1QB_HUMAN]	7	7	10	8	8	6	8	7	8	8	7.33333	7.66667	5	4	4	4	6	5	4.33333	5
139	P02747	C1QC	Complement C1q subcomponent subunit C OS=Homo sapiens GN=C1QC PE=1 SV=3 - [C1QC_HUMAN]	6	6	5	6	6	6	6	6	5	5.66667	6	5.66667	5	5	5	5	4	5	5	4.66667
30	P00736	C1R	Complement C1r subcomponent OS=Homo sapiens GN=C1R PE=1 SV=2 - [C1R_HUMAN]	26	28	27	25	30	31	25	31	26	27	28.6667	27.3333	24	21	21	24	25	27	22	25.3333
204	P09871	C1S	Complement C1s subcomponent OS=Homo sapiens GN=C1S PE=1 SV=1 - [C1S_HUMAN]	25	23	25	25	25	26	26	23	23	24.3333	25.3333	24	16	14	17	15	15	16	15.6667	15.3333
206	P0C0L4	C4A	Complement C4-A OS=Homo sapiens GN=C4A PE=1 SV=2 - [CO4A_HUMAN]	100	100	106	106	98	104	96	99	97	102	102.667	97.3333	77	75	76	77	74	76	76	75.6667
207	P0C0L5	C4B	Complement C4-B OS=Homo sapiens GN=C4B PE=1 SV=2 - [CO4B_HUMAN]	100	98	106	109	98	105	98	99	96	101.333	104	97.6667	78	73	75	75	73	76	75.3333	74.6667
226	P13671	C6	Complement component C6 OS=Homo sapiens GN=C6 PE=1 SV=3 - [CO6_HUMAN]	30	35	26	31	37	33	39	29	42	30.3333	33.6667	36.6667	23	21	24	23	20	24	22.6667	22.3333
195	P07357	C8A	Complement component C8 alpha chain OS=Homo sapiens GN=C8A PE=1 SV=2 - [CO8A_HUMAN]	17	20	14	15	24	18	17	19	18	17	19	18	16	18	17	16	14	17	17	15.6667
197	P07360	C8G	Complement component C8 gamma chain OS=Homo sapiens GN=C8G PE=1 SV=3 - [CO8G_HUMAN]	4	11	7	7	10	6	8	5	11	7.33333	7.66667	8	8	8	7	8	7	7	7.66667	7.33333
140	P02748	C9	Complement component C9 OS=Homo sapiens GN=C9 PE=1 SV=2 - [CO9_HUMAN]	6	13	8	11	8	18	9	8	14	9	12.3333	10.3333	13	11	17	14	11	15	13.6667	13.3333
36	P00751	CFB	Complement factor B OS=Homo sapiens GN=CFB PE=1 SV=2 - [CFAB_HUMAN]	8	12	4	11	16	12	11	5	12	8	13	9.33333	24	26	24	24	26	27	24.6667	25.6667
291	Q03591	CFHR1	Complement factor H-related protein 1 OS=Homo sapiens GN=CFHR1 PE=1 SV=2 - [FHR1_HUMAN]	17	13	14	14	16	15	16	17	16	14.6667	15	16.3333	11	10	11	10	10	12	10.6667	10.6667
289	Q02985	CFHR3	Complement factor H-related protein 3 OS=Homo sapiens GN=CFHR3 PE=1 SV=2 - [FHR3_HUMAN]	3	4	3	3	3	4	3	3	5	3.33333	3.33333	3.66667	NA	NA	NA	NA	NA	NA	NA	NA
451	Q02413	DSG1	Desmoglein-1 OS=Homo sapiens GN=DSG1 PE=1 SV=2 - [DSG1_HUMAN]	NA	NA	NA	NA	NA	NA	NA	NA	NA	NA	NA	NA	6	NA	NA	NA	NA	NA	6	NA
427	P15924	DESP	Desmoplakin OS=Homo sapiens GN=DSP PE=1 SV=3 - [DESP_HUMAN]	NA	NA	NA	NA	NA	NA	NA	NA	NA	NA	NA	NA	4	NA	NA	NA	NA	NA	4	NA
132	P02671	FGA	Fibrinogen alpha chain OS=Homo sapiens GN=FGA PE=1 SV=2 - [FIBA_HUMAN]	1	NA	7	3	NA	11	41	22	14	4	7	25.6667	41	38	37	41	37	37	38.6667	38.3333
133	P02675	FGB	Fibrinogen beta chain OS=Homo sapiens GN=FGB PE=1 SV=2 - [FIBB_HUMAN]	3	2	5	5	NA	10	43	28	14	3.33333	7.5	28.3333	36	34	39	34	33	35	36.3333	34
134	P02679	FGG	Fibrinogen gamma chain OS=Homo sapiens GN=FGG PE=1 SV=3 - [FIBG_HUMAN]	4	2	10	3	2	14	33	22	15	5.33333	6.33333	23.3333	30	27	29	30	25	30	28.6667	28.3333
312	Q15485	FCN2	Ficolin-2 OS=Homo sapiens GN=FCN2 PE=1 SV=2 - [FCN2_HUMAN]	1	3	4	4	5	NA	3	3	2	2.66667	4.5	2.66667	1	NA	1	2	2	2	1	2
21	O75636	FCN3	Ficolin-3 OS=Homo sapiens GN=FCN3 PE=1 SV=2 - [FCN3_HUMAN]	6	8	8	8	7	8	10	6	8	7.33333	7.66667	8	8	6	6	6	5	6	6.66667	5.66667
20	O75369	FLNB	Filamin-B OS=Homo sapiens GN=FLNB PE=1 SV=2 - [FLNB_HUMAN]	NA	NA	NA	1	1	NA	NA	NA	NA	NA	1		NA	NA	NA	NA	NA	NA	NA	NA
160	P04196	HRG	Histidine-rich glycoprotein OS=Homo sapiens GN=HRG PE=1 SV=1 - [HRG_HUMAN]	11	13	11	10	13	14	12	14	12	11.6667	12.3333	12.6667	11	11	11	11	11	11	11	11
31	P00738	HPT	Haptoglobin OS=Homo sapiens GN=HP PE=1 SV=1 - [HPT_HUMAN]	11	15	16	17	11	16	22	17	19	14	14.6667	19.3333	29	27	28	27	27	29	28	27.6667
32	P00739	HPR	Haptoglobin-related protein OS=Homo sapiens GN=HPR PE=1 SV=2 - [HPTR_HUMAN]	15	22	20	19	15	17	20	22	20	19	17	20.6667	19	18	20	19	17	18	19	18
439	P54652	HSPA2	Heat shock-related 70 kDa protein 2 OS=Homo sapiens GN=HSPA2 PE=1 SV=1 - [HSP72_HUMAN]	NA	NA	NA	NA	NA	NA	NA	NA	NA	NA	NA	NA	2	NA	NA	1	1	1	2	1
447	P68871	HBB	Hemoglobin subunit beta OS=Homo sapiens GN=HBB PE=1 SV=2 - [HBB_HUMAN]	NA	NA	NA	NA	NA	NA	NA	NA	NA	NA	NA	NA	13	8	12	11	11	10	11	10.6667
124	P02042	HBD	Hemoglobin subunit delta OS=Homo sapiens GN=HBD PE=1 SV=2 - [HBD_HUMAN]	NA	NA	NA	1	NA	NA	NA	NA	NA	NA	1	NA	8	3	6	5	5	4	5.66667	4.66667
153	P02790	HEMO	Hemopexin OS=Homo sapiens GN=HPX PE=1 SV=2 - [HEMO_HUMAN]	5	5	3	4	5	6	13	5	7	4.33333	5	8.33333	9	11	9	9	10	12	9.66667	10.3333
329	Q86YZ3	HORN	Hornerin OS=Homo sapiens GN=HRNR PE=1 SV=2 - [HORN_HUMAN]	NA	NA	NA	1	NA	NA	1	NA	NA	NA	1	1	3	NA	NA	2	NA	NA	3	2
387	Q9Y6R7	FCGBP	IgGFc-binding protein OS=Homo sapiens GN=FCGBP PE=1 SV=3 - [FCGBP_HUMAN]	19	22	26	14	34	33	25	46	11	22.3333	27	27.3333	7	6	7	6	6	8	6.66667	6.66667
9	B9A064	IGLL5	Immunoglobulin lambda-like polypeptide 5 OS=Homo sapiens GN=IGLL5 PE=2 SV=2 - [IGLL5_HUMAN]	7	7	7	7	8	8	7	8	9	7	7.66667	8	7	7	8	7	7	7	7.33333	7
238	P19827	ITIH1	Inter-alpha-trypsin inhibitor heavy chain H1 OS=Homo sapiens GN=ITIH1 PE=1 SV=3 - [ITIH1_HUMAN]	24	30	21	29	31	30	26	26	30	25	30	27.3333	26	23	23	23	24	24	24	23.6667
237	P19823	ITIH2	Inter-alpha-trypsin inhibitor heavy chain H2 OS=Homo sapiens GN=ITIH2 PE=1 SV=2 - [ITIH2_HUMAN]	35	37	30	40	40	40	32	30	41	34	40	34.3333	33	32	36	34	31	32	33.6667	32.3333
308	Q14624	ITIH4	Inter-alpha-trypsin inhibitor heavy chain H4 OS=Homo sapiens GN=ITIH4 PE=1 SV=4 - [ITIH4_HUMAN]	13	11	7	14	19	23	22	16	14	10.3333	18.6667	17.3333	21	26	27	21	23	25	24.6667	23
125	P02533	KRT14	Keratin, type I cytoskeletal 14 OS=Homo sapiens GN=KRT14 PE=1 SV=4 - [K1C14_HUMAN]	4	5	3	4	9	7	4	6	6	4	6.66667	5.33333	10	4	3	4	2	3	5.66667	3
203	P08779	KRT16	Keratin, type I cytoskeletal 16 OS=Homo sapiens GN=KRT16 PE=1 SV=4 - [K1C16_HUMAN]	5	5	3	3	11	7	4	4	5	4.33333	7	4.33333	NA	NA	NA	NA	NA	NA	NA	NA
292	Q04695	KRT17	Keratin, type I cytoskeletal 17 OS=Homo sapiens GN=KRT17 PE=1 SV=2 - [K1C17_HUMAN]	2	2	2	2	4	3	3	3	4	2	3	3.33333	NA	NA	NA	NA	NA	NA	NA	NA
168	P04264	KRT1	Keratin, type II cytoskeletal 1 OS=Homo sapiens GN=KRT1 PE=1 SV=6 - [K2C1_HUMAN]	22	26	16	23	20	29	28	27	28	21.3333	24	27.6667	30	22	24	25	15	26	25.3333	22
325	Q7Z794	KRT77	Keratin, type II cytoskeletal 1b OS=Homo sapiens GN=KRT77 PE=1 SV=3 - [K2C1B_HUMAN]	2	3	3	3	3	3	2	3	4	2.66667	3	3	NA	NA	NA	NA	NA	NA	NA	NA
449	Q01546	KRT76	Keratin, type II cytoskeletal 2 oral OS=Homo sapiens GN=KRT76 PE=1 SV=2 - [K22O_HUMAN]	NA	NA	NA	NA	NA	NA	NA	NA	NA	NA	NA	NA	8	2	3	4	2	4	4.33333	3.33333
126	P02538	KRT6A	Keratin, type II cytoskeletal 6A OS=Homo sapiens GN=KRT6A PE=1 SV=3 - [K2C6A_HUMAN]	7	6	4	5	11	6	9	5	6	5.66667	7.33333	6.66667	NA	NA	NA	NA	NA	NA	NA	NA
435	P48668	KRT6C	Keratin, type II cytoskeletal 6C OS=Homo sapiens GN=KRT6C PE=1 SV=3 - [K2C6C_HUMAN]	NA	NA	NA	NA	NA	NA	NA	NA	NA	NA	NA	NA	9	4	3	4	2	4	5.33333	3.33333
464	Q6KB66	KRT80	Keratin, type II cytoskeletal 80 OS=Homo sapiens GN=KRT80 PE=1 SV=2 - [K2C80_HUMAN]	NA	NA	NA	NA	NA	NA	NA	NA	NA	NA	NA	NA	2	1	1	1	1	1	1.33333	1
44	P01042	KNG1	Kininogen-1 OS=Homo sapiens GN=KNG1 PE=1 SV=2 - [KNG1_HUMAN]	8	4	3	7	11	9	8	4	4	5	9	5.33333	16	16	14	15	15	16	15.3333	15.3333
268	P48740	MASP1	Mannan-binding lectin serine protease 1 OS=Homo sapiens GN=MASP1 PE=1 SV=3 - [MASP1_HUMAN]	7	4	9	8	8	5	7	10	5	6.66667	7	7.33333	4	4	3	4	3	5	3.66667	4
11	O00187	MASP2	Mannan-binding lectin serine protease 2 OS=Homo sapiens GN=MASP2 PE=1 SV=4 - [MASP2_HUMAN]	NA	1	1	1	NA	NA	3	4	1	1	1	2.66667	NA	NA	NA	NA	NA	1	NA	1
218	P11226	MBL2	Mannose-binding protein C OS=Homo sapiens GN=MBL2 PE=1 SV=2 - [MBL2_HUMAN]	1	NA	1	1	9	2	6	10	4	1	4	6.66667	2	1	1	2	1	2	1.33333	1.66667
300	Q13201	MMRN1	Multimerin-1 OS=Homo sapiens GN=MMRN1 PE=1 SV=3 - [MMRN1_HUMAN]	NA	NA	NA	NA	NA	NA	NA	2	11	NA	NA	6.5	NA	NA	NA	NA	NA	NA	NA	NA
179	P05155	SERPING1	Plasma protease C1 inhibitor OS=Homo sapiens GN=SERPING1 PE=1 SV=2 - [IC1_HUMAN]	12	10	9	10	15	12	9	12	10	10.3333	12.3333	10.3333	5	9	7	10	3	6	7	6.33333
34	P00747	PLMN	Plasminogen OS=Homo sapiens GN=PLG PE=1 SV=2 - [PLMN_HUMAN]	48	61	45	53	57	50	48	44	50	51.3333	53.3333	47.3333	44	47	44	46	45	46	45	45.6667
113	P01833	PIGR	Polymeric immunoglobulin receptor OS=Homo sapiens GN=PIGR PE=1 SV=4 - [PIGR_HUMAN]	13	8	11	12	13	5	1	19	15	10.6667	10	11.6667	NA	3	1	11	2	NA	2	6.5
420	P0CG48	UBC	Polyubiquitin-C OS=Homo sapiens GN=UBC PE=1 SV=3 - [UBC_HUMAN]	NA	NA	NA	NA	NA	NA	NA	NA	NA	NA	NA	NA	1	NA	NA	NA	NA	NA	1	NA
239	P20742	PZP	Pregnancy zone protein OS=Homo sapiens GN=PZP PE=1 SV=4 - [PZP_HUMAN]	6	7	5	6	6	11	11	5	7	6	7.66667	7.66667	33	20	12	14	11	9	21.6667	11.3333
294	Q07954	LRP1	Prolow-density lipoprotein receptor-related protein 1 OS=Homo sapiens GN=LRP1 PE=1 SV=2 - [LRP1_HUMAN]	2	NA	NA	NA	NA	2	NA	5	1	2	2	3	NA	NA	NA	NA	NA	NA	NA	NA
144	P02760	AMBP	Protein AMBP OS=Homo sapiens GN=AMBP PE=1 SV=1 - [AMBP_HUMAN]	6	6	6	7	7	10	10	6	8	6	8	8	12	12	12	10	12	12	12	11.3333
336	Q8TF72	SHROOM3	Protein Shroom3 OS=Homo sapiens GN=SHROOM3 PE=1 SV=2 - [SHRM3_HUMAN]	NA	NA	NA	NA	NA	1	NA	NA	NA	NA	1	NA	NA	NA	NA	NA	NA	NA	NA	NA
340	Q92954	PRG4	Proteoglycan 4 OS=Homo sapiens GN=PRG4 PE=1 SV=2 - [PRG4_HUMAN]	2	NA	NA	NA	NA	NA	NA	NA	NA	2	NA	NA	NA	NA	NA	1	1	1	NA	1
29	P00734	THRB	Prothrombin OS=Homo sapiens GN=F2 PE=1 SV=2 - [THRB_HUMAN]	29	28	33	28	27	28	29	28	31	30	27.6667	29.3333	30	29	28	29	28	27	29	28
152	P02787	TRFE	Serotransferrin OS=Homo sapiens GN=TF PE=1 SV=3 - [TRFE_HUMAN]	26	19	28	30	30	28	42	30	29	24.3333	29.3333	33.6667	43	48	45	44	45	47	45.3333	45.3333
136	P02743	APCS	Serum amyloid P-component OS=Homo sapiens GN=APCS PE=1 SV=2 - [SAMP_HUMAN]	7	6	7	8	8	8	6	7	8	6.66667	8	7	6	7	7	7	6	7	6.66667	6.66667
251	P27169	PON1	Serum paraoxonase/arylesterase 1 OS=Homo sapiens GN=PON1 PE=1 SV=3 - [PON1_HUMAN]	12	12	12	14	12	14	13	12	12	12	13.3333	12.3333	9	9	9	8	7	6	9	7
147	P02766	TTHY	Transthyretin OS=Homo sapiens GN=TTR PE=1 SV=1 - [TTHY_HUMAN]	4	2	5	2	NA	5	4	2	3	3.66667	3.5	3	3	3	5	4	4	4	3.66667	4
446	P67936	TPM4	Tropomyosin alpha-4 chain OS=Homo sapiens GN=TPM4 PE=1 SV=3 - [TPM4_HUMAN]	NA	NA	NA	NA	NA	NA	NA	NA	NA	NA	NA	NA	1	NA	NA	NA	NA	NA	1	NA
149	P02774	GC	Vitamin D-binding protein OS=Homo sapiens GN=GC PE=1 SV=1 - [VTDB_HUMAN]	6	7	6	9	6	7	16	6	8	6.33333	7.33333	10	17	16	14	16	14	13	15.6667	14.3333
194	P07225	PROS1	Vitamin K-dependent protein S OS=Homo sapiens GN=PROS1 PE=1 SV=1 - [PROS_HUMAN]	25	27	29	27	27	23	27	30	29	27	25.6667	28.6667	18	14	15	13	17	15	15.6667	15
157	P04004	VTNC	Vitronectin OS=Homo sapiens GN=VTN PE=1 SV=1 - [VTNC_HUMAN]	8	7	7	7	8	11	6	10	9	7.33333	8.66667	8.33333	6	7	5	6	7	8	6	7
169	P04275	VWF	von Willebrand factor OS=Homo sapiens GN=VWF PE=1 SV=4 - [VWF_HUMAN]	30	27	54	13	40	2	70	18	20	37	18.3333	36	4	3	4	NA	3	NA	3.66667	3

## Sheet: EV markers based on PSMs
				Batch 1 (ExoQuick)												Batch 2 (ExoSpin)
				Non-smokers			Smokers			COPD			Average No. of identified PSMs			Non-smokers			COPD			Average No. of identified PSMs
	Accession	Gene Symbol	Description.x	PSM_NS1	PSM_NS2	PSM_NS3	PSM_S1	PSM_S2	PSM_S3	PSM_COPD1	PSM_COPD2	PSM_COPD3	Non-smokers	Smokers	COPD	PSM_NS4	PSM_NS5	PSM_NS6	PSM_COPD4	PSM_COPD5	PSM_COPD6	Non-smokers	COPD
445	P63267	ACTG2	Actin, gamma-enteric smooth muscle OS=Homo sapiens GN=ACTG2 PE=1 SV=1 - [ACTH_HUMAN]	NA	NA	NA	NA	NA	NA	NA	NA	NA	NA	NA	NA	8	7	5	4	9	4	6.66667	5.66667
267	P43652	AFAM	Afamin OS=Homo sapiens GN=AFM PE=1 SV=1 - [AFAM_HUMAN]	NA	NA	NA	NA	NA	NA	4	1	1	NA	NA	2	4	6	5	5	4	3	5	4
145	P02763	ORM1	Alpha-1-acid glycoprotein 1 OS=Homo sapiens GN=ORM1 PE=1 SV=1 - [A1AG1_HUMAN]	NA	1	1	1	1	1	2	1	1	1	1	1.33333	NA	NA	NA	1	NA	1	NA	1
236	P19652	ORM2	Alpha-1-acid glycoprotein 2 OS=Homo sapiens GN=ORM2 PE=1 SV=2 - [A1AG2_HUMAN]	1	2	1	5	1	3	2	3	5	1.33333	3	3.33333	NA	NA	NA	NA	NA	2	NA	2
39	P01011	AACT	Alpha-1-antichymotrypsin OS=Homo sapiens GN=SERPINA3 PE=1 SV=2 - [AACT_HUMAN]	16	18	17	9	12	37	19	16	11	17	19.3333	15.3333	10	13	10	11	9	12	11	10.6667
38	P01009	A1AT	Alpha-1-antitrypsin OS=Homo sapiens GN=SERPINA1 PE=1 SV=3 - [A1AT_HUMAN]	24	24	26	34	20	54	91	41	35	24.6667	36	55.6667	16	52	25	28	21	27	31	25.3333
202	P08697	A2AP	Alpha-2-antiplasmin OS=Homo sapiens GN=SERPINF2 PE=1 SV=3 - [A2AP_HUMAN]	7	8	3	17	4	13	6	11	8	6	11.3333	8.33333	12	13	12	9	10	11	12.3333	10
166	P04217	A1BG	Alpha-1B-glycoprotein OS=Homo sapiens GN=A1BG PE=1 SV=4 - [A1BG_HUMAN]	4	1	3	3	3	4	6	3	4	2.66667	3.33333	4.33333	8	10	4	6	8	7	7.33333	7
146	P02765	FETUA	Alpha-2-HS-glycoprotein OS=Homo sapiens GN=AHSG PE=1 SV=1 - [FETUA_HUMAN]	3	NA	3	4	3	5	1	2	2	3	4	1.66667	2	3	2	3	3	1	2.33333	2.33333
426	P15144	ANPEP	Aminopeptidase N OS=Homo sapiens GN=ANPEP PE=1 SV=4 - [AMPN_HUMAN]	NA	NA	NA	NA	NA	NA	NA	NA	NA	NA	NA	NA	1	NA	NA	NA	NA	NA	1	NA
40	P01019	ANGT	Angiotensinogen OS=Homo sapiens GN=AGT PE=1 SV=1 - [ANGT_HUMAN]	4	6	3	2	3	3	16	5	3	4.33333	2.66667	8	6	6	3	6	5	5	5	5.33333
37	P01008	ANT3	Antithrombin-III OS=Homo sapiens GN=SERPINC1 PE=1 SV=1 - [ANT3_HUMAN]	6	6	6	8	9	16	14	14	7	6	11	11.6667	22	19	20	19	18	18	20.3333	18.3333
199	P08519	APOA	Apolipoprotein(a) OS=Homo sapiens GN=LPA PE=1 SV=1 - [APOA_HUMAN]	7	18	50	94	77	91	30	59	21	25	87.3333	36.6667	8	7	7	9	19	3	7.33333	10.3333
127	P02647	APOA1	Apolipoprotein A-I OS=Homo sapiens GN=APOA1 PE=1 SV=1 - [APOA1_HUMAN]	28	38	28	44	29	41	43	39	40	31.3333	38	40.6667	27	37	39	32	28	32	34.3333	30.6667
129	P02652	APOA2	Apolipoprotein A-II OS=Homo sapiens GN=APOA2 PE=1 SV=1 - [APOA2_HUMAN]	NA	NA	NA	NA	NA	2	NA	NA	NA	NA	2	NA	2	4	3	4	NA	5	3	4.5
191	P06727	APOA4	Apolipoprotein A-IV OS=Homo sapiens GN=APOA4 PE=1 SV=3 - [APOA4_HUMAN]	13	12	11	13	6	15	11	11	4	12	11.3333	8.66667	17	18	22	14	17	23	19	18
159	P04114	APOB	Apolipoprotein B-100 OS=Homo sapiens GN=APOB PE=1 SV=2 - [APOB_HUMAN]	522	1040	340	856	958	852	299	484	453	634	888.667	412	480	430	461	717	488	489	457	564.667
177	P05090	APOD	Apolipoprotein D OS=Homo sapiens GN=APOD PE=1 SV=1 - [APOD_HUMAN]	10	10	7	12	11	11	7	6	7	9	11.3333	6.66667	6	7	10	7	6	7	7.66667	6.66667
14	O14791	APOL1	Apolipoprotein L1 OS=Homo sapiens GN=APOL1 PE=1 SV=5 - [APOL1_HUMAN]	20	16	11	9	13	12	13	18	19	15.6667	11.3333	16.6667	5	8	6	9	5	5	6.33333	6.33333
244	P22792	CPN2	Carboxypeptidase N subunit 2 OS=Homo sapiens GN=CPN2 PE=1 SV=3 - [CPN2_HUMAN]	NA	2	NA	2	1	2	2	2	1	2	1.66667	1.66667	2	4	4	5	3	4	3.33333	4
158	P04040	CATA	Catalase OS=Homo sapiens GN=CAT PE=1 SV=3 - [CATA_HUMAN]	NA	NA	NA	NA	NA	NA	NA	3	NA	NA	NA	3	4	NA	NA	NA	NA	NA	4	NA
156	P04003	C4BPA	C4b-binding protein alpha chain OS=Homo sapiens GN=C4BPA PE=1 SV=2 - [C4BPA_HUMAN]	147	181	196	138	213	161	198	209	200	174.667	170.667	202.333	74	59	54	72	77	75	62.3333	74.6667
240	P20851	C4BPB	C4b-binding protein beta chain OS=Homo sapiens GN=C4BPB PE=1 SV=1 - [C4BPB_HUMAN]	17	17	27	20	16	19	16	23	13	20.3333	18.3333	17.3333	6	5	5	5	7	4	5.33333	5.33333
17	O43866	CD5L	CD5 antigen-like OS=Homo sapiens GN=CD5L PE=1 SV=1 - [CD5L_HUMAN]	53	40	37	26	26	25	44	45	62	43.3333	25.6667	50.3333	15	18	16	22	18	16	16.3333	18.6667
26	P00450	CERU	Ceruloplasmin OS=Homo sapiens GN=CP PE=1 SV=1 - [CERU_HUMAN]	19	40	30	41	59	52	39	24	45	29.6667	50.6667	36	55	56	48	55	46	55	53	52
403	P06276	CHLE	Cholinesterase OS=Homo sapiens GN=BCHE PE=1 SV=1 - [CHLE_HUMAN]	NA	NA	NA	NA	NA	NA	NA	NA	NA	NA	NA	NA	NA	NA	2	2	NA	4	2	3
28	P00488	F13A1	Coagulation factor XIII A chain OS=Homo sapiens GN=F13A1 PE=1 SV=4 - [F13A_HUMAN]	4	6	NA	1	4	NA	20	9	7	5	2.5	12	15	13	12	15	10	12	13.3333	12.3333
353	Q9BWP8	COL11	Collectin-11 OS=Homo sapiens GN=COLEC11 PE=1 SV=1 - [COL11_HUMAN]	NA	NA	1	NA	1	NA	NA	4	NA	1	1	4	NA	NA	NA	NA	NA	NA	NA	NA
138	P02746	C1QB	Complement C1q subcomponent subunit B OS=Homo sapiens GN=C1QB PE=1 SV=3 - [C1QB_HUMAN]	38	50	58	46	45	37	62	70	48	48.6667	42.6667	60	10	6	7	7	10	10	7.66667	9
139	P02747	C1QC	Complement C1q subcomponent subunit C OS=Homo sapiens GN=C1QC PE=1 SV=3 - [C1QC_HUMAN]	14	21	19	15	14	13	20	25	16	18	14	20.3333	7	6	7	6	5	7	6.66667	6
30	P00736	C1R	Complement C1r subcomponent OS=Homo sapiens GN=C1R PE=1 SV=2 - [C1R_HUMAN]	42	51	55	43	59	59	52	80	37	49.3333	53.6667	56.3333	33	33	28	39	36	40	31.3333	38.3333
204	P09871	C1S	Complement C1s subcomponent OS=Homo sapiens GN=C1S PE=1 SV=1 - [C1S_HUMAN]	40	38	36	42	41	43	40	38	38	38	42	38.6667	19	18	21	20	17	20	19.3333	19
206	P0C0L4	C4A	Complement C4-A OS=Homo sapiens GN=C4A PE=1 SV=2 - [CO4A_HUMAN]	341	427	483	476	366	454	352	433	386	417	432	390.333	222	194	232	198	199	223	216	206.667
207	P0C0L5	C4B	Complement C4-B OS=Homo sapiens GN=C4B PE=1 SV=2 - [CO4B_HUMAN]	326	407	498	471	366	463	358	448	382	410.333	433.333	396	226	193	235	200	203	225	218	209.333
226	P13671	C6	Complement component C6 OS=Homo sapiens GN=C6 PE=1 SV=3 - [CO6_HUMAN]	43	53	30	51	67	62	62	45	80	42	60	62.3333	25	24	26	26	23	25	25	24.6667
195	P07357	C8A	Complement component C8 alpha chain OS=Homo sapiens GN=C8A PE=1 SV=2 - [CO8A_HUMAN]	21	26	16	17	33	28	18	22	25	21	26	21.6667	23	23	20	18	17	22	22	19
197	P07360	C8G	Complement component C8 gamma chain OS=Homo sapiens GN=C8G PE=1 SV=3 - [CO8G_HUMAN]	5	16	8	8	16	7	10	6	13	9.66667	10.3333	9.66667	10	10	8	12	8	9	9.33333	9.66667
140	P02748	C9	Complement component C9 OS=Homo sapiens GN=C9 PE=1 SV=2 - [CO9_HUMAN]	6	17	8	12	8	24	10	9	18	10.3333	14.6667	12.3333	16	14	23	17	13	19	17.6667	16.3333
36	P00751	CFB	Complement factor B OS=Homo sapiens GN=CFB PE=1 SV=2 - [CFAB_HUMAN]	8	13	4	12	18	12	13	5	13	8.33333	14	10.3333	30	32	29	31	33	33	30.3333	32.3333
291	Q03591	CFHR1	Complement factor H-related protein 1 OS=Homo sapiens GN=CFHR1 PE=1 SV=2 - [FHR1_HUMAN]	74	44	57	57	57	44	64	69	65	58.3333	52.6667	66	15	14	14	11	11	16	14.3333	12.6667
289	Q02985	CFHR3	Complement factor H-related protein 3 OS=Homo sapiens GN=CFHR3 PE=1 SV=2 - [FHR3_HUMAN]	5	8	5	4	4	12	4	4	8	6	6.66667	5.33333	NA	NA	NA	NA	NA	NA	NA	NA
451	Q02413	DSG1	Desmoglein-1 OS=Homo sapiens GN=DSG1 PE=1 SV=2 - [DSG1_HUMAN]	NA	NA	NA	NA	NA	NA	NA	NA	NA	NA	NA	NA	6	NA	NA	NA	NA	NA	6	NA
427	P15924	DESP	Desmoplakin OS=Homo sapiens GN=DSP PE=1 SV=3 - [DESP_HUMAN]	NA	NA	NA	NA	NA	NA	NA	NA	NA	NA	NA	NA	4	NA	NA	NA	NA	NA	4	NA
132	P02671	FGA	Fibrinogen alpha chain OS=Homo sapiens GN=FGA PE=1 SV=2 - [FIBA_HUMAN]	1	NA	9	3	NA	12	199	44	16	5	7.5	86.3333	193	169	176	191	170	165	179.333	175.333
133	P02675	FGB	Fibrinogen beta chain OS=Homo sapiens GN=FGB PE=1 SV=2 - [FIBB_HUMAN]	3	2	5	5	NA	11	278	44	24	3.33333	8	115.333	246	214	211	215	193	169	223.667	192.333
134	P02679	FGG	Fibrinogen gamma chain OS=Homo sapiens GN=FGG PE=1 SV=3 - [FIBG_HUMAN]	4	2	13	3	2	15	152	36	18	6.33333	6.66667	68.6667	133	110	102	109	96	91	115	98.6667
312	Q15485	FCN2	Ficolin-2 OS=Homo sapiens GN=FCN2 PE=1 SV=2 - [FCN2_HUMAN]	1	3	4	4	5	NA	3	3	2	2.66667	4.5	2.66667	1	NA	1	2	2	2	1	2
21	O75636	FCN3	Ficolin-3 OS=Homo sapiens GN=FCN3 PE=1 SV=2 - [FCN3_HUMAN]	7	12	10	13	10	14	18	10	12	9.66667	12.3333	13.3333	9	6	8	7	7	8	7.66667	7.33333
20	O75369	FLNB	Filamin-B OS=Homo sapiens GN=FLNB PE=1 SV=2 - [FLNB_HUMAN]	NA	NA	NA	1	1	NA	NA	NA	NA	NA	1	NA	NA	NA	NA	NA	NA	NA	NA	NA
160	P04196	HRG	Histidine-rich glycoprotein OS=Homo sapiens GN=HRG PE=1 SV=1 - [HRG_HUMAN]	17	18	15	16	20	29	16	25	24	16.6667	21.6667	21.6667	13	16	12	15	14	16	13.6667	15
31	P00738	HPT	Haptoglobin OS=Homo sapiens GN=HP PE=1 SV=1 - [HPT_HUMAN]	12	19	19	20	12	22	25	20	22	16.6667	18	22.3333	103	91	55	92	144	106	83	114
32	P00739	HPR	Haptoglobin-related protein OS=Homo sapiens GN=HPR PE=1 SV=2 - [HPTR_HUMAN]	23	38	30	32	20	26	28	36	32	30.3333	26	32	52	51	34	47	72	54	45.6667	57.6667
439	P54652	HSPA2	Heat shock-related 70 kDa protein 2 OS=Homo sapiens GN=HSPA2 PE=1 SV=1 - [HSP72_HUMAN]	NA	NA	NA	NA	NA	NA	NA	NA	NA	NA	NA	NA	2	NA	NA	1	1	1	2	1
447	P68871	HBB	Hemoglobin subunit beta OS=Homo sapiens GN=HBB PE=1 SV=2 - [HBB_HUMAN]	NA	NA	NA	NA	NA	NA	NA	NA	NA	NA	NA	NA	18	9	15	14	19	12	14	15
124	P02042	HBD	Hemoglobin subunit delta OS=Homo sapiens GN=HBD PE=1 SV=2 - [HBD_HUMAN]	NA	NA	NA	1	NA	NA	NA	NA	NA	NA	1	NA	10	3	6	6	8	4	6.33333	6
153	P02790	HEMO	Hemopexin OS=Homo sapiens GN=HPX PE=1 SV=2 - [HEMO_HUMAN]	5	6	3	4	5	7	17	6	8	4.66667	5.33333	10.3333	12	15	10	11	13	17	12.3333	13.6667
329	Q86YZ3	HORN	Hornerin OS=Homo sapiens GN=HRNR PE=1 SV=2 - [HORN_HUMAN]	NA	NA	NA	1	NA	NA	1	NA	NA	NA	1	1	3	NA	NA	2	NA	NA	3	2
387	Q9Y6R7	FCGBP	IgGFc-binding protein OS=Homo sapiens GN=FCGBP PE=1 SV=3 - [FCGBP_HUMAN]	20	26	29	14	42	39	30	55	12	25	31.6667	32.3333	7	6	7	6	6	8	6.66667	6.66667
9	B9A064	IGLL5	Immunoglobulin lambda-like polypeptide 5 OS=Homo sapiens GN=IGLL5 PE=2 SV=2 - [IGLL5_HUMAN]	60	72	74	65	72	70	65	82	67	68.6667	69	71.3333	30	40	53	33	46	36	41	38.3333
238	P19827	ITIH1	Inter-alpha-trypsin inhibitor heavy chain H1 OS=Homo sapiens GN=ITIH1 PE=1 SV=3 - [ITIH1_HUMAN]	38	56	29	53	87	75	49	39	82	41	71.6667	56.6667	51	41	48	41	44	45	46.6667	43.3333
237	P19823	ITIH2	Inter-alpha-trypsin inhibitor heavy chain H2 OS=Homo sapiens GN=ITIH2 PE=1 SV=2 - [ITIH2_HUMAN]	68	83	52	82	94	96	62	67	117	67.6667	90.6667	82	80	63	73	76	65	65	72	68.6667
308	Q14624	ITIH4	Inter-alpha-trypsin inhibitor heavy chain H4 OS=Homo sapiens GN=ITIH4 PE=1 SV=4 - [ITIH4_HUMAN]	14	12	8	16	23	27	24	19	15	11.3333	22	19.3333	25	31	30	27	26	32	28.6667	28.3333
125	P02533	KRT14	Keratin, type I cytoskeletal 14 OS=Homo sapiens GN=KRT14 PE=1 SV=4 - [K1C14_HUMAN]	4	6	3	4	10	7	4	6	6	4.33333	7	5.33333	10	4	3	4	2	3	5.66667	3
203	P08779	KRT16	Keratin, type I cytoskeletal 16 OS=Homo sapiens GN=KRT16 PE=1 SV=4 - [K1C16_HUMAN]	5	6	3	3	12	7	4	4	5	4.66667	7.33333	4.33333	NA	NA	NA	NA	NA	NA	NA	NA
292	Q04695	KRT17	Keratin, type I cytoskeletal 17 OS=Homo sapiens GN=KRT17 PE=1 SV=2 - [K1C17_HUMAN]	2	2	2	2	4	3	3	3	4	2	3	3.33333	NA	NA	NA	NA	NA	NA	NA	NA
168	P04264	KRT1	Keratin, type II cytoskeletal 1 OS=Homo sapiens GN=KRT1 PE=1 SV=6 - [K2C1_HUMAN]	23	31	17	28	24	39	38	32	32	23.6667	30.3333	34	41	25	27	29	17	29	31	25
325	Q7Z794	KRT77	Keratin, type II cytoskeletal 1b OS=Homo sapiens GN=KRT77 PE=1 SV=3 - [K2C1B_HUMAN]	2	3	3	3	3	3	2	3	5	2.66667	3	3.33333	NA	NA	NA	NA	NA	NA	NA	NA
449	Q01546	KRT76	Keratin, type II cytoskeletal 2 oral OS=Homo sapiens GN=KRT76 PE=1 SV=2 - [K22O_HUMAN]	NA	NA	NA	NA	NA	NA	NA	NA	NA	NA	NA	NA	12	2	3	4	2	4	5.66667	3.33333
126	P02538	KRT6A	Keratin, type II cytoskeletal 6A OS=Homo sapiens GN=KRT6A PE=1 SV=3 - [K2C6A_HUMAN]	7	6	4	5	11	6	9	5	6	5.66667	7.33333	6.66667	NA	NA	NA	NA	NA	NA	NA	NA
435	P48668	KRT6C	Keratin, type II cytoskeletal 6C OS=Homo sapiens GN=KRT6C PE=1 SV=3 - [K2C6C_HUMAN]	NA	NA	NA	NA	NA	NA	NA	NA	NA	NA	NA	NA	13	4	3	4	2	4	6.66667	3.33333
464	Q6KB66	KRT80	Keratin, type II cytoskeletal 80 OS=Homo sapiens GN=KRT80 PE=1 SV=2 - [K2C80_HUMAN]	NA	NA	NA	NA	NA	NA	NA	NA	NA	NA	NA	NA	3	1	1	1	1	1	1.66667	1
44	P01042	KNG1	Kininogen-1 OS=Homo sapiens GN=KNG1 PE=1 SV=2 - [KNG1_HUMAN]	8	4	3	7	11	9	11	4	4	5	9	6.33333	17	18	15	16	18	18	16.6667	17.3333
268	P48740	MASP1	Mannan-binding lectin serine protease 1 OS=Homo sapiens GN=MASP1 PE=1 SV=3 - [MASP1_HUMAN]	7	4	9	8	8	5	7	11	5	6.66667	7	7.66667	4	4	3	4	3	5	3.66667	4
11	O00187	MASP2	Mannan-binding lectin serine protease 2 OS=Homo sapiens GN=MASP2 PE=1 SV=4 - [MASP2_HUMAN]	NA	1	1	1	NA	NA	3	4	1	1	1	2.66667	NA	NA	NA	NA	NA	1	NA	1
218	P11226	MBL2	Mannose-binding protein C OS=Homo sapiens GN=MBL2 PE=1 SV=2 - [MBL2_HUMAN]	1	NA	1	1	15	2	9	14	4	1	6	9	2	1	1	2	1	2	1.33333	1.66667
300	Q13201	MMRN1	Multimerin-1 OS=Homo sapiens GN=MMRN1 PE=1 SV=3 - [MMRN1_HUMAN]	NA	NA	NA	NA	NA	NA	NA	2	14			8	NA	NA	NA	NA	NA	NA	NA	NA
179	P05155	SERPING1	Plasma protease C1 inhibitor OS=Homo sapiens GN=SERPING1 PE=1 SV=2 - [IC1_HUMAN]	16	14	13	12	23	19	16	16	13	14.3333	18	15	6	10	8	11	3	7	8	7
34	P00747	PLMN	Plasminogen OS=Homo sapiens GN=PLG PE=1 SV=2 - [PLMN_HUMAN]	102	153	97	112	152	120	102	103	120	117.333	128	108.333	84	93	79	87	82	89	85.3333	86
113	P01833	PIGR	Polymeric immunoglobulin receptor OS=Homo sapiens GN=PIGR PE=1 SV=4 - [PIGR_HUMAN]	13	11	21	15	15	5	1	27	18	15	11.6667	15.3333	NA	3	1	11	2	NA	2	6.5
420	P0CG48	UBC	Polyubiquitin-C OS=Homo sapiens GN=UBC PE=1 SV=3 - [UBC_HUMAN]	NA	NA	NA	NA	NA	NA	NA	NA	NA	NA	NA	NA	1	NA	NA	NA	NA	NA	1	NA
239	P20742	PZP	Pregnancy zone protein OS=Homo sapiens GN=PZP PE=1 SV=4 - [PZP_HUMAN]	11	20	9	10	19	31	30	11	22	13.3333	20	21	87	70	60	71	74	56	72.3333	67
294	Q07954	LRP1	Prolow-density lipoprotein receptor-related protein 1 OS=Homo sapiens GN=LRP1 PE=1 SV=2 - [LRP1_HUMAN]	2	NA	NA	NA	NA	2	NA	5	1	2	2	3	NA	NA	NA	NA	NA	NA	NA	NA
144	P02760	AMBP	Protein AMBP OS=Homo sapiens GN=AMBP PE=1 SV=1 - [AMBP_HUMAN]	10	14	11	16	14	22	20	12	18	11.6667	17.3333	16.6667	18	18	17	18	17	17	17.6667	17.3333
336	Q8TF72	SHROOM3	Protein Shroom3 OS=Homo sapiens GN=SHROOM3 PE=1 SV=2 - [SHRM3_HUMAN]	NA	NA	NA	NA	NA	1	NA	NA	NA	NA	1	NA	NA	NA	NA	NA	NA	NA	NA	NA
340	Q92954	PRG4	Proteoglycan 4 OS=Homo sapiens GN=PRG4 PE=1 SV=2 - [PRG4_HUMAN]	3	NA	NA	NA	NA	NA	NA	NA	NA	3	NA	NA	NA	NA	NA	1	1	1	NA	1
29	P00734	THRB	Prothrombin OS=Homo sapiens GN=F2 PE=1 SV=2 - [THRB_HUMAN]	53	53	74	61	57	56	74	52	67	60	58	64.3333	58	56	50	56	52	52	54.6667	53.3333
152	P02787	TRFE	Serotransferrin OS=Homo sapiens GN=TF PE=1 SV=3 - [TRFE_HUMAN]	32	22	34	34	34	31	65	37	37	29.3333	33	46.3333	90	112	94	102	87	105	98.6667	98
136	P02743	APCS	Serum amyloid P-component OS=Homo sapiens GN=APCS PE=1 SV=2 - [SAMP_HUMAN]	7	7	7	8	9	9	6	7	9	7	8.66667	7.33333	6	7	7	7	7	8	6.66667	7.33333
251	P27169	PON1	Serum paraoxonase/arylesterase 1 OS=Homo sapiens GN=PON1 PE=1 SV=3 - [PON1_HUMAN]	22	24	18	35	21	36	18	26	28	21.3333	30.6667	24	14	13	13	11	8	9	13.3333	9.33333
147	P02766	TTHY	Transthyretin OS=Homo sapiens GN=TTR PE=1 SV=1 - [TTHY_HUMAN]	4	2	5	2	NA	5	5	3	3	3.66667	3.5	3.66667	3	4	6	4	5	5	4.33333	4.66667
446	P67936	TPM4	Tropomyosin alpha-4 chain OS=Homo sapiens GN=TPM4 PE=1 SV=3 - [TPM4_HUMAN]	NA	NA	NA	NA	NA	NA	NA	NA	NA	NA	NA	NA	2	NA	NA	NA	NA	NA	2	NA
149	P02774	GC	Vitamin D-binding protein OS=Homo sapiens GN=GC PE=1 SV=1 - [VTDB_HUMAN]	7	8	7	10	7	8	18	7	9	7.33333	8.33333	11.3333	24	23	18	22	17	19	21.6667	19.3333
194	P07225	PROS1	Vitamin K-dependent protein S OS=Homo sapiens GN=PROS1 PE=1 SV=1 - [PROS_HUMAN]	46	50	70	53	59	52	50	66	62	55.3333	54.6667	59.3333	23	17	18	17	20	17	19.3333	18
157	P04004	VTNC	Vitronectin OS=Homo sapiens GN=VTN PE=1 SV=1 - [VTNC_HUMAN]	10	8	8	10	9	14	8	14	12	8.66667	11	11.3333	7	12	6	9	9	9	8.33333	9
169	P04275	VWF	von Willebrand factor OS=Homo sapiens GN=VWF PE=1 SV=4 - [VWF_HUMAN]	37	31	77	13	44	2	100	20	22	48.3333	19.6667	47.3333	4	3	4	NA	3	NA	3.66667	3
